1 **Title:** Rapid progression is associated with lymphoid follicle dysfunction in SIV-infected infant  
2 rhesus macaques

3 **Short Title:** Lymphoid Dysfunction and Rapid SIV Progression in Infant Macaques

4

5 Matthew P. Wood<sup>1</sup>, Chloe I. Jones<sup>1</sup>, Adriana Lippy<sup>1</sup>, Brian G. Oliver<sup>1</sup>, Brynn Walund<sup>1</sup>, Katherine A.

6 Fancher<sup>1</sup>, Bridget S. Fisher<sup>1</sup>, Piper J. Wright<sup>1</sup>, James T. Fuller<sup>2</sup>, Patience Murapa<sup>2,3</sup>, Jakob

7 Habib<sup>4,5</sup>, Maud Mavigner<sup>4,5</sup>, Ann Chahroudi<sup>4,5</sup>, D. Noah Sather<sup>1</sup>, Deborah H. Fuller<sup>2,3</sup>, Donald L.

8 Sodora<sup>1</sup>

9

10 1 Center for Global Infectious Disease Research, Seattle Children's Research Institute, Seattle,  
11 Washington, USA

12 2 University of Washington Department of Microbiology, Seattle, WA

13 3 Washington National Primate Research Center, Seattle WA

14 4 Yerkes National Primate Research Center, Emory University School of Medicine, Atlanta,  
15 Georgia, USA

16 5 Department of Pediatrics, Emory University School of Medicine, Atlanta, Georgia, USA

17 6 Center for Childhood Infections and Vaccines of Children's Healthcare of Atlanta and Emory  
18 University, Atlanta, GA USA

19

20

21

22

23 **Abstract**

24 HIV-infected infants are at an increased risk of progressing rapidly to AIDS in the first weeks of

25 life. Here, we evaluated immunological and virological parameters in 25 SIV-infected infant

26 rhesus macaques to understand the factors influencing a rapid disease outcome. Infant

27 macaques were infected with SIVmac251 and monitored for 10 to 17 weeks post-infection. SIV-  
28 infected infants were divided into either typical (TypP) or rapid (RP) progressor groups based on  
29 levels of plasma anti-SIV antibody levels and SIV plasma viral load (with RP infants having low  
30 SIV-specific antibodies and high viral loads). Following SIV infection, 11 out of 25 infant  
31 macaques exhibited an RP phenotype, with 5 of these succumbing to AIDS-related infections.  
32 Interestingly, the TypP and RP infants were similar in their CD4 depletion and activation of CD8  
33 T cells as measured by the levels of HLA-DR on the cell surface. However, differences between  
34 the two groups were identified in other immune cell populations, including a failure to expand  
35 activated memory (CD21-CD27+) B cells in peripheral blood in RP infant macaques, as well as  
36 reduced levels of germinal center (GC) B cells and T follicular helper (Tfh) cells in spleens (4-  
37 and 10-weeks post-SIV). Reduced B cell proliferation in splenic germinal GCs was associated  
38 with increased SIV+ cell density and follicular type 1 interferon (IFN)-induced immune activation.  
39 Further analyses determined that at 2-weeks post SIV infection TypP infants exhibited elevated  
40 levels of the GC-inducing chemokine CXCL13 in plasma, as well as significantly lower levels of  
41 viral envelope diversity compared to RP infants. Our findings provide evidence that early viral  
42 and immunologic events following SIV infection contributes to impairment of B cells, Tfh cells  
43 and germinal center formation, ultimately impeding the development of SIV-specific antibody  
44 responses in rapidly progressing infant macaques.

45

46

47

48 Key words: HIV, SIV, Infants, B cells, Spleen, oral transmission

49

## 50 **Introduction**

51 Despite significant reductions in vertical HIV transmission, nearly 100,000 children

52 succumb to AIDS-related illnesses each year (1). This can be in part attributed to a

53 disproportionately higher risk of progressing to AIDS, with roughly half of infected infants  
54 exhibiting rapid disease progression within the first two years of life (2-7). Despite this  
55 observation being first reported early in the epidemic (4, 8), factors influencing why some infants  
56 exhibit a rapid HIV progression phenotype have yet to be fully understood.

57 Acute HIV infection is characterized by exponential viral replication in blood and tissues,  
58 depletion of mucosal CD4 T cells, production of type 1 interferons (IFNs) and increased IFN-  
59 induced gene transcription (9). This is typically followed by an expansion of activated B cells in  
60 the blood and lymph nodes and production of anti-HIV antibodies targeting viral envelope  
61 proteins (10). While the initial reduction of viral replication coincides with antibody production,  
62 antibodies produced during this period lack virus neutralizing activity, and viral control at the  
63 onset of chronic infection is often attributed to CD8 T cell responses (11, 12). However, in  
64 infants and children who progress rapidly to AIDS, plasma viral loads remain elevated well  
65 beyond acute infection, resulting in sustained type 1 IFN production (13), increased levels of  
66 inflammatory immune mediators (14, 15) and a failure to develop humoral HIV responses (4).

67 Much of our mechanistic understanding of rapid progression to AIDS in infants comes  
68 from the macaque SIV model (16-18). Previous studies demonstrated that a proportion of infant  
69 macaques infected through repeated oral exposures generally exhibited several characteristics  
70 consistent with rapid HIV infection in infant humans; including high plasma viral loads following  
71 acute infection and an absence of virus-specific plasma antibodies (19, 20). Other studies  
72 demonstrated that SIV infects, and presumably replicates within, multiple oral mucosal and  
73 associated lymphoid tissues by as early as 24 hours, before spreading to several distal tissue  
74 sites (18, 21). Macaques that fail to reduce viral load following acute infection also have been  
75 shown to exhibit elevated and sustained type 1 IFN-induced gene expression in lymphoid  
76 organs (22, 23).

77 Given that lymphoid tissues are critical for B cell development within germinal centers,  
78 and that macaques that rapidly progress to AIDS fail to develop humoral responses (24-27), we

79 hypothesized that early viral replication and associated aberrant innate activation impairs B cell  
80 follicle function and prevents initial humoral responses following acute SIV infection. Here we  
81 have assessed samples from 25 infant rhesus macaques, 11 of which failed to produce  
82 substantial plasma concentrations of anti-SIV antibodies and exhibiting a phenotype consistent  
83 with rapid progression (RP). In contrast, 14 infant macaques exhibited a more typical disease  
84 progression phenotype (TypP), similar to that observed in adult animals. However, RP infants  
85 were distinct in that they possessed higher SIV genetic diversity in blood during acute infection,  
86 and did not increase plasma CXCL13 following infection. In addition, they exhibited significantly  
87 elevated plasmacytoid dendritic cell (pDC) activation and increased type I IFN mediated protein  
88 expression in B cell follicles, as well as dramatically elevated IFN $\alpha$  levels in blood during chronic  
89 infection. These results support a model wherein early events following infection drive aberrant  
90 innate responses, which are associated with lymphoid dysfunction and failure to develop  
91 humoral immunity in rapidly progressing HIV/SIV-infected infants.

92

## 93 **Results**

94 **Oral SIV infection in macaque infants results in similar proportions of infants with rapid**  
95 **and typical disease progression.** To evaluate the pathogenic outcome following oral mucosal  
96 SIV infection, infant rhesus macaques were infected through a series of escalating dose oral  
97 challenges with SIVmac251 and monitored for up to 22 weeks (median 10 weeks)(**Fig. 1A**). SIV  
98 plasma viral load was measured throughout the time course (**Fig. 1B**), and we focused on time  
99 points that reflect acute (2 weeks post-SIV), acute-chronic transition (4-6 weeks post-SIV) and  
100 the chronic phase (10+ weeks) of infection to assess differences over time. (**Fig. 1C**). Plasma  
101 levels of anti-gp130 (Env)-specific IgG (**Fig. 1D**) and IgA (**Fig. 1E**) antibodies were evaluated at  
102 weeks 0, 4-6, and 10-12 post-SIV. Based on these observations, SIV-infected infant macaques  
103 can be divided into rapid progressors (RP) being those with the highest viral loads after week 2  
104 and undetectable or very low levels of SIV-Env specific IgG and IgA antibodies during chronic

105 infection. Factors that were not associated with rapid disease progression included SIV dose,  
106 sex or previous vaccination from a separate study (**Table 1**). Age also did not appear to be a  
107 factor contributing to disease progression, with median ages of SIV acquisition for TypP and RP  
108 macaques being 11 weeks and 13 weeks, respectively. Additionally, 8 of 11 RP macaques  
109 developed clinical signs of simian AIDS prior to the end of the study follow-up, based on reports  
110 from veterinary staff. All infants showing clinical signs of AIDS exhibited either chronic SIV-  
111 associated diarrheal disease, failure to gain weight and wasting. This finding is consistent with  
112 earlier reports of SIV pathology in rapidly progressing macaques, with severe enteropathy and  
113 wasting observed in the absence of opportunistic infections (28).

114  
115 **Acute stage levels of unique plasma viral variants negatively correlate with chronic stage**  
116 **anti-SIV antibodies.** Based on previous work linking viral genetic diversity at acute infection  
117 with disease outcome (29), we evaluated viral diversity by the number of V1V2 Env variants  
118 during acute infection. Plasma was obtained at 2 weeks post-SIV infection and viral diversity  
119 within V1V2 region of SIV envelope assessed by Illumina miSeq. This V1V2 478 bp region was  
120 selected as it contained the highest degree of DNA sequence variability within our SIVmac251  
121 challenge strain. Representative phylogenies constructed by maximum likelihood are depicted  
122 for TypP (**Fig. 2A**) and RP (**Fig. 2B**) infants. After enumerating unique variant clusters in each  
123 infant group, we observed a significantly greater number of variants present at 2 weeks post-  
124 SIV in the RP compared to TypP macaques (**Fig. 2C**). We also observed an inverse correlation  
125 between the anti-SIV-ENV IgG level (at week 10-12) and the number of observed V1V2 variant  
126 clusters (**Fig. 2D**). Phylogenetic assessment of V1V2 variants in the SIVmac251 challenge  
127 stock and infant macaque plasma revealed that variants from RP infants are represented across  
128 a greater number of clades sharing sequences with the challenge stock than those from TypP  
129 infants (**Fig. S1A and S1B**), indicating a more diverse genetic background in RP infant-derived  
130 plasma SIV. Greater genetic diversity in V1V2 of RP infant macaques suggests that RP infants

131 are either infected with a greater number of SIV founders originating from the challenge stock,  
132 or that when macaques are initially infected, there are increased levels of SIV replication, and  
133 consequently accumulated mutations, within RP infants at 2 weeks post-SIV infection compared  
134 to the TypP infants.

135  
136 **Total CD4 T cell levels are sustained during chronic infection of RP infants.** To assess  
137 CD4 T cell depletion in SIV-infected infants, numbers of CD4 and CD8 T cells per mL of whole  
138 blood were used to calculate the CD4/CD8 ratio over time. Surprisingly, similar CD4/CD8 ratios  
139 were observed in both groups of infants at each time point examined (**Fig. 3A and 3B**).

140 Assessment of total CD4<sup>+</sup> T cells (CD4<sup>+</sup>, CD3<sup>+</sup>) in peripheral blood revealed that RP infants  
141 had similar levels of CD4 cells pre-SIV infection through early chronic infection, compared to  
142 TypP infants. However, CD4 levels were significantly higher in the RP group (mean 3.2 fold  
143 increase) during chronic infection (**Fig. 3C**). This increased CD4 levels in RP macaques  
144 potentially reflects an expansion of naive T cells, which has previously been reported (28). This  
145 finding indicates that the infant RP phenotype is not associated with depletion of total peripheral  
146 CD4 T cells.

147 Chronic activation of CD4 and CD8 T cells is an established correlate of progression to  
148 AIDS in both HIV and SIV infections (30-32). To explore the link between T cell activation and  
149 the rapid progression phenotype observed in infant macaques, the levels of HLA-DR were  
150 assessed on T cell subsets within both macaque groups (**Fig. 4A, B**). The level of HLA-DR<sup>+</sup>  
151 CD8 T cells was significantly increased in the TypP at both 4-6 (2.9-fold) and 10-12 (6.6-fold)  
152 weeks post-SIV (**Fig. 4A**). In the CD4<sup>+</sup> population, the TypP macaques exhibited modest yet  
153 significant increases in HLA-DR levels at the 4-6 week time point (1.7-fold) (**Fig. 4B**). Loss of  
154 gut barrier function and associated microbial translocation has been characterized as a  
155 significant driver of T cell activation and inflammation during both chronic HIV and SIV infections  
156 (31, 33). To evaluate microbial translocation in TypP and RP infants, soluble CD14 (sCD14) and

157 LPS binding protein (LPB) concentrations were measured in plasma collected at weeks 0, 2, 4-  
158 6, and 10-12 post-SIV (**Figure S2A, B**). These findings demonstrate that despite a more rapid  
159 disease progression, the RP infants exhibit similar levels of sCD14 and LPB, as well as  
160 unexpectedly low levels of CD4 and CD8 T cell activation.

161  
162 **Rapidly progressing infants fail to increase activated memory B cells during chronic**  
163 **infection.** The lack of SIV-specific antibodies in the RP infant macaques raised the question as  
164 to whether memory B cell levels and activation were altered in RP compared to the TypP  
165 macaques. Assessment of B cells levels within peripheral blood revealed that the percentage of  
166 B cells (%CD20+ of CD3- PBMCs) was 1.5-fold higher at 10 to 12 weeks post-SIV in the TypP  
167 macaques compared to RP (**Fig. 5A**). Bidirectional interactions between T cells and B cells are  
168 necessary for effective humoral responses, and ineffective B cell costimulatory function has  
169 previously been linked to impaired CD80 expression on B cells of HIV-viremic patients (34).  
170 Comparing CD80+ B cells in RP and TypP macaques revealed that RP infants failed to increase  
171 the levels of this cell population during early chronic infection (**Fig. 5B**). By 5 weeks post-SIV  
172 TypP infants exhibited significantly higher CD80+ B cells than RP infants and this trend  
173 continued through 12 weeks post-infection, with TypP infants having on average 8.4-fold higher  
174 levels of circulating B cells expressing CD80. To further characterize changes in B cell  
175 populations following infection in both groups of infants, B cell memory subsets were evaluated  
176 in PBMC based on expression of CD21 and CD27 on CD20+ B cells. TypP infants exhibited  
177 elevated levels of activated memory (CD21-, CD27+) B cells compared to the RP macaques  
178 (9.8-fold) at 10-12 weeks post-SIV (**Fig. 5C**). In addition to an increase in activated memory B  
179 cells in TypP infants from baseline (3.3-fold), we observed a significant decrease from baseline  
180 levels of activated memory B cells in RP infants (3-fold). The decrease in activated memory B  
181 cells in RP infants was offset by an elevation in the level of naive B cells (CD21+, CD27-) (**Fig.**  
182 **5D**). Shifts in proportions of B cell subsets were restricted to naive and activated memory

183 compartments, as no differences were observed in proportions of resting memory (CD21+,  
184 CD27+) and tissue-like memory (CD21-, CD27-) B cells (**Fig. S3A-C**). Previous studies have  
185 identified an increase in activated memory B cells expressing CXCR3 and CD11c with chronic  
186 viral infections in mice and humans, as well as with regard to HIV-specific antibody responses  
187 (35, 36). Since a defining characteristic of the RP infants is an inability to produce SIV-specific  
188 IgG (37), we examined the association between CXCR3+ CD11c+ memory B cells and plasma  
189 anti-env IgG concentrations. The proportion of activated memory (CD27+,CD21-) B cells  
190 expressing CXCR3 and CD11c was significantly elevated in the TypP compared to the RP  
191 infant macaques (**Fig. 5E**), and expression of these two markers on activated memory B cells  
192 directly correlated with the levels of anti-SIV antibodies present at week 10-12 post-infection  
193 ( $p < 0.0001$ ) (**Fig. 5F**). These findings provide evidence that low levels of plasma anti-SIV-Env  
194 antibodies are due to insufficient memory B cell activation in RP infant macaques.

195  
196 **Rapidly progressing infants exhibit germinal center dysfunction in secondary lymphoid**  
197 **tissues.** Migration of GC B cells as well as Tfh cells into follicles of lymphoid tissues is  
198 coordinated by the chemokine CXCL13 (38, 39), which is predominantly expressed by follicular  
199 dendritic cells and macrophages (38). Evaluation of plasma CXCL13 identified significantly  
200 increased concentrations in the plasma of TypP, but not RP, macaques at week 2 (1.9-fold) and  
201 weeks 4-6 (1.5-fold) compared to week 0 (**Fig. 6A**). Assessment of Tfh (CD4+ CXCR5+ PD-1hi)  
202 within the axillary lymph nodes indicated that by 3-4 weeks post-SIV, TypP infants had  
203 significantly higher levels of Tfh cells than RP infants (2.31-fold)(**Fig. 6B**). At necropsy, TypP  
204 infants experienced a significant increase in Tfh levels from the 4-6 week early chronic timepoint  
205 (3.35-fold) while RP infants experienced significant reductions (6.59-fold), resulting in dramatic  
206 differences in Tfh cell levels between the 2 groups (>50-fold difference). B cells in the lymph  
207 nodes associated with germinal centers (Ki-67+, BCL6+) were similarly elevated in TypP infants  
208 at necropsy compared to RP infants (**Fig. 6C**). The proportion of GC B cells also underwent an



209 expansion (3.09-fold) in TypP infants while contracting in RP infants (3.12-fold) during the  
210 period from early chronic SIV infection until necropsy. This differential outcome resulted in 23-  
211 fold higher levels of GC B cells in the TypP infants by the time of necropsy compared to RP  
212 infants. To further evaluate the GC B cells (follicular, CD20+, Ki67+) their levels were assessed  
213 in lymph nodes and spleen (**Fig. 6D, E**). Significantly more GC B cells were observed in splenic  
214 follicles of TypP versus RP (**Fig. 6F**), however levels of GC B cells were similar within the lymph  
215 nodes (**Fig. 6G**). Together these findings suggest a failure to induce functional germinal centers  
216 in spleens of RP infants, while TypP infants undergo a more typical expansion of Tfh and GC B  
217 cells.

218  
219 **Elevated interferon-induced immune activation in lymphoid tissues and B cell follicles of**  
220 **RP infants.** Type-I interferon associated immune changes have previously been described as a  
221 significant factor driving pathogenesis of HIV and SIV (40-43). Assessment of plasma IFN $\alpha$   
222 identified sustained elevated levels within the RP macaque plasma compared to the TypP  
223 macaques at both 4-6 and 10-12 weeks post-infection, with 8-fold higher concentrations of IFN $\alpha$   
224 in RP infants (mean 270pg/ml) compared to TypP (33 pg/ml)(**Fig. 7A**). During activation and  
225 maturation, pDCs have been shown to increase expression of the costimulatory marker CD80  
226 (44, 45). Therefore, pDC activation was measured as the proportion of CD80+ pDC out of total  
227 CD123+/CD11c- CD14- cells using flow cytometry. We determined that while there were similar  
228 levels of CD80 on circulating pDC, these levels were significantly higher in the axillary lymph  
229 nodes of RP macaques, with the proportion of CD80+ pDC in RP infants doubling that of TypP  
230 infants by 4-6 weeks post-SIV (**Fig 7B, C**). This finding identifies activated pDC in lymphoid  
231 tissues as a potential source of elevated plasma IFN $\alpha$  in RP macaques.

232 To assess a direct association between elevated levels of type 1 IFN and the inability to  
233 produce high levels of SIV-specific antibodies the expression of the IFN-induced protein MX1  
234 was evaluated in splenic B cell follicles. While MX1 was detected in the extrafollicular area of

235 both TypP and RP macaques (**Fig. 8A,D**), relatively low levels of follicular MX1 production were  
236 observed in TypP infants (**Fig. 8B,C**). In contrast, RP macaques exhibited significantly  
237 increased MX1 expression in splenic germinal centers (**Fig. 8D-G**). Regions of elevated MX1 in  
238 RP infants which corresponded to sites proximal to follicles were identified as expressing a  
239 majority of SIV-infected cells by RNA-scope *in situ* hybridization (**Fig. 9A,B**). Scanning entire  
240 splenic sections determined that RP infants had significantly more SIV-positive cells/mm<sup>2</sup>  
241 compared to TypP infants, and that these cells are largely present in the T cell zones proximal  
242 to B cell follicles (**Fig. 9C**). These data demonstrate that increased IFN responses are observed  
243 in sites of B cell maturation in RP macaques, and that this is associated with an inability of RP  
244 infant macaques to mount SIV-specific antibody responses.

## 245 246 **Discussion**

247 Factors contributing to rapid progression to AIDS in infants remain poorly understood. Here, we  
248 demonstrate that 44% (11/25) of infant macaques infected with SIVmac251 between 6 and 18  
249 months of age develop elevated SIV replication, very low or undetectable levels of SIV-specific  
250 antibodies and a more rapid disease course. Importantly, the frequency, as well as  
251 immunological, virologic, and clinical aspects of this phenotype recapitulate what has been  
252 reported in rapidly progressing HIV-infected infants (2, 4, 7, 8), and thus our findings likely  
253 reflect underlying factors driving more severe clinical outcomes. An evaluation of the immune  
254 dysfunction observed in RP infant macaques provides evidence for altered memory B cell and T  
255 follicular helper cell levels, as well as activation of lymphoid pDCs. Importantly, we have  
256 demonstrated an elevated type-I IFN-induced protein expression, similar to previous studies of  
257 rapidly progressing macaques (22, 23). The elevated type-1 IFN was observed in B cell follicles  
258 and was associated with GC dysfunction, supporting the hypothesis that aberrant IFN-driven  
259 immune activation contributes to B cell dysfunction and failure to mount humoral responses in  
260 rapidly progressing infants. An interesting finding from this study was a lack of evidence that RP

261 phenotype in infant macaques was associated with increased T cell activation or microbial  
262 translocation, as has been observed previously (31-33, 47). In contrast, TypP infants exhibited  
263 moderate levels of SIV plasma viremia, CD4 T cell depletion, systemic immune activation and  
264 development of hyperplastic B cell follicles more routinely associated with progression to simian  
265 AIDS (32, 48).

266 Identification of multiple genotypes at the initiation of infection (week 2) can be due to  
267 two possible explanations. First, there may be an increase in the number of founder viruses that  
268 infect the macaques via the oral route in the RP compared to the TypP infant macaques.  
269 Second, it is possible that increased V1V2 variants is the result of increased viral replication,  
270 and accompanying genetic mutations, due to factors intrinsic to the RP infants. Previous work  
271 from Tsai et al identified a link between rapid SIV disease progression and the number as well  
272 as relatedness of viral variants determined by sequencing of *SIVenv* gene (29). This study used  
273 an R5 SHIV to infect adult female macaques intravaginally and identified a subset of macaques  
274 that failed to control viremia and developed AIDS at 30 weeks post-infection. Similar to our  
275 findings, this study found that rapidly progressing macaques had a greater number of plasma  
276 viral variants, with fewer genetic variants identified in the more typical “chronic progressors”.

277 While there is evidence for both expansion as well as early depletion of Tfh cells during  
278 SIV infection (53, 54), it is poorly understood whether loss of Tfh cells, and their precursors,  
279 may be attributed to direct killing from SIV or to aberrant inflammatory signaling driving  
280 apoptosis (46, 54). Selective infection of Tfh cells by HIV and SIV has been observed in both  
281 adult and infant macaques (55-58), yet rather than direct infection driving Tfh loss, infected Tfh  
282 cells are reported to serve as sanctuaries for viral persistence (55). Interestingly, adult  
283 macaques exhibiting a more rapid disease progression have trended toward lower proviral DNA  
284 levels in Tfh compared to those with more typical disease severity (54). However, while we  
285 observed similar levels of cell free virus within B cell follicle light zones (**Fig. 9**), the majority of  
286 SIV-infected cells and the brightest areas of MX1 production were observed at the periphery of

287 follicles (**Fig. 8**). This suggests that follicular cells do not harbor a majority of infected cells in  
288 both the RP and TypP groups. It is possible that the expression of IFN-induced proapoptotic  
289 genes (49, 59-62) during pathogenic SIV infection results in the death of Tfh cells, explaining  
290 the low level of germinal center T cells producing virus within these infant macaques.

291         These data allow for the elucidation of a model that summarizes our findings and  
292 outlines factors that may influence the RP phenotype outcome in the SIV infant macaques (Fig.  
293 10). Temporally our first observation was the increase in genetic variability in SIV env V1V2 at 2  
294 weeks post-infection (Fig. 10.1). This may be a contributing factor to, or conversely a  
295 consequence of, progression toward the RP phenotype. Viral replication drives activation of  
296 pDCs in tissue, including lymph nodes where they were observed during the late acute early  
297 chronic transition at 4-6 weeks post-infection (Fig. 10.2), The pDC activation is the likely source  
298 of elevated type 1 IFN production, which we first observe in the plasma at the same timepoint as  
299 pDC activation (Fig. 10.3). The prolonged elevated type 1 IFN could have direct effects on  
300 expansion of memory B cells and B cell function (49-51), as well as potentially influencing Tfh  
301 cell function within the lymph nodes (52) (Fig. 10.4). Germinal center dysfunction may also be  
302 influenced by failing to increase plasma concentrations of the chemokine CXCL13 (Fig. 10.5).  
303 This GC dysfunction is associated with a failure to mount an effective anti-SIV antibody  
304 responses (Fig 10.6). The findings described here therefore provide insights into the early  
305 response to the SIV infection driving outcomes toward either rapid or typical disease  
306 progression.

307         To summarize, these findings provide an in-depth characterization linking virological and  
308 immunological aspects of rapid SIV progression in infant macaques. Moreover, rapidly  
309 progressing macaques described here display a distinct pathology defined by failure to mount  
310 humoral immune responses and reflects key aspects of rapid progression to AIDS in infant  
311 humans. Our results also provide a detailed description of germinal center dysfunction and point  
312 to a role for aberrant IFN-signaling in germinal centers as a potential driver of this outcome.

313 While survival of HIV-infected infants has improved proportionally with access to antiviral  
314 therapy, early severe disease still occurs and often precedes antiretroviral therapy (63). These  
315 findings build on our understanding of infant HIV pathogenesis and can potentially be used  
316 towards the development of improved therapies and interventions.

317

## 318 **Methods**

### 319 *Study Animals*

320 All animal studies were approved by the University of Washington Animal Care and Use  
321 Committee (IACUC) under protocol #4213. 25 infant rhesus macaques were purchased and  
322 transported from the Oregon National Primate Center and were housed in the specialized infant  
323 care wing of the Washington National Primate Research Center (WaNPRC). At 5-10 weeks of  
324 age, up to 8 oral SIV challenges were administered as escalating doses ranging from 1000  
325 TCID<sub>50</sub> to 20000 TCID<sub>50</sub> of SIVmac251. SIVmac251 challenges were prepared from rhesus  
326 macaque PBMC-grown supernatant, obtained from NIH AIDS Reagent Program and Dr. Nancy  
327 Miller (NIH/NIAID). Virus was diluted to 0.25 mL in RPMI1640 media and delivered dropwise  
328 across the oral mucosa via needleless syringe. Infection was confirmed by plasma viral loads  
329 (WaNPRC Virology Core). Infants that remained uninfected (plasma viral load  $\leq$ 30 copies SIV  
330 RNA /mL for 2 weeks post-challenge) after 8 oral challenges were infected intravenously with  
331 500 TCID<sub>50</sub> of the same challenge stock (3 macaques were infected in this way) to evaluate  
332 disease pathogenesis in all infants. Infants were monitored for 9 to 12 weeks after SIV infection  
333 before being euthanized. Rhesus MHC-1 typing did not account for the frequency of rapid  
334 progression between MHC genotype and skewed susceptibility to SIV in either study group  
335 (**Table 1**).

336

### 337 *Phenotypic Analysis of Immune Cell Subsets*

338 Phenotypic analyses of PBMC and lymph node cell populations were performed by  
339 multiparametric flow cytometry. Freshly isolated PBMC were counted and stained as previously  
340 described (64). Briefly, activation of T cells (CD3+, CD20-, CD14-), classical monocytes (HLA-  
341 DR+, CD14+, CD16-, CD20-, CD3-) and CD16+ monocytes (HLA-DR+, CD14+, CD16+, CD20-,  
342 CD3-) was assessed using gating strategies outlined in **Figures S1 and S2**. The following  
343 antibodies were used: CD3(SP34-2)-Pacific Blue and APC, CD4(OKT4)-BV650 and APC-Cy7,  
344 CD8(SK1)-APC-H7, CD20(2H7)-BV570 and PE, CD14(M5E2)-BV785 and APC-H7,  
345 CD16(3G8)-BV605, CD11c(S-HCL-3)-APC, CD123(7G3)-PerCP-Cy5.5, CCR5(3A9)-APC,  
346 CXCR3(1C6)-PE-CF594, CD38(AT-1)-FITC, Ki-67(B65)-PE and FITC, HLA-DR(L243)-BV711  
347 and PE, CD80(L307.4)-PE-Cy7, CD83(HB15e)-PE-CF594, CD86(2331)-BV711 (BD Life  
348 Sciences). Stained cells were washed and fixed in 1% paraformaldehyde before analysis on a  
349 LSR-II flow cytometer (BD Biosciences). Compensation and analysis were performed using  
350 FlowJo version 10 (v. 10.5.3, FlowJo LLC)

351

#### 352 *Analysis of plasma protein and IgG/IgA concentrations*

353 Plasma samples were collected after centrifugation of whole blood collected in EDTA tubes.  
354 Plasma IFN $\alpha$  concentrations were measured with the Human IFN- $\alpha$  ELISA<sup>PRO</sup>kit (Mabtech),  
355 following the manufacturer's instructions. Plasma CXCL13 was measured using a Human BLC  
356 ELISA kit (Ray Biotech). Plasma sCD14 was measured using the Human CD14 Quantikine  
357 ELISA kit (R&D Systems). Plasma LPS binding protein (LBP) was measured using an LBP  
358 quantification immunoassay (Biometec). Measurement of plasma anti-SIVgp140 IgG and IgA  
359 concentrations was performed using a custom ELISA containing wells coated with rGP130  
360 (NIH-ARP #12797). Samples were serially diluted and absorbance values were fit to standard  
361 curves generated using either purified rhesus IgG or IgA.

362

#### 363 *SIV env sequence analysis*

364 Viral RNA was isolated from rhesus macaque plasma from 2 weeks post-SIV infection using an  
365 Ultrasense Viral RNA kit (QIAGEN) and cDNA was reverse transcribed using the Applied  
366 Biosystems High Capacity cDNA synthesis kit (Thermo-Fisher). Libraries were prepared using a  
367 2 step PCR protocol for amplifying the 584bp product with adaptors. First round primers: F:  
368 TAGAGGATGTATGGCAACTC and R: CTTGTGCATGAAGAGACCA. Second round primers: F:  
369 TCGTCGGCAGCGTCAGATGTGTATAAGAGACAGTATGGCAACTCTTTGAGACC and R:  
370 GTCTCGTGGGCTCGGAGATGTGTATAAGAGACAGGAAGAGACCACCACCTTAG. PCR  
371 products were FLASH-gel purified and a 5-cycle indexing PCR was used for addition of P5 and  
372 P7 Illumina indices. Libraries were loaded onto an Illumina 600 cycle V3 cartridge according to  
373 the manufacturer's instructions and run on an Illumina MiSeq as described previously (65).  
374 Amplicons were reconstructed from forward and reverse FASTQ reads via FLASH with  
375 maximum and minimum parameters set so that >95% of reads were aligned. Adaptor  
376 sequences were removed using cutadapt with error rate of 0.3 and minimum length of 100bp.  
377 Sequence quality filters were applied using FASTQ\_quality\_filter with a minimum quality score  
378 of 20, and the minimum percent of bases that must have the set minimum quality score to  
379 100%. Duplicates were removed using dedupe2.sh, allowing for maximum mismatches of 5 and  
380 maximum edits set to 2. In individual plasma samples from infants infected by oral challenge,  
381 this approach provided an average of 258 thousand sequences after filtering paired reads  
382 based on quality score. After collapsing identical sequences, unique variant clusters were  
383 identified as a set of sequences with no more than 5bp mismatches among them. Additionally,  
384 these unique variants were present at levels of at least 10 copies to be considered for further  
385 analysis. Fastq files were converted to fasta and aligned with Clustal  $\Omega$  and unique genotypes  
386 were enumerated. Alignments were uploaded to the DIVEIN analysis server where phylogenies  
387 were constructed by maximum likelihood using the generalized time reversal substitution model  
388 (66). Pairwise distance was calculated using a consensus sequence derived from the 331  
389 sequenced V1V2 variants represented within our SIVmac251 challenge stock.

390

391 *Tissue imaging*

392 Immunofluorescence microscopy was carried out as previously described (67), with the

393 following exceptions: B cells were targeted using  $\alpha$ -CD20 (clone EP459Y, Abcam, 1:300);

394 proliferating cells were targeted using anti-Ki-67 (clone MM1, Leica Biosystems, 1:100); cells

395 responding to IFN signaling were targeted by anti-Mx1 (clone M143, EMD Millipore, 1:500).

396 CD20 was detected using goat anti-rabbit Alexa Fluor 594 (Life Technologies, 1:500) while Ki-

397 67 and Mx1 were detected using goat anti-mouse Alexa Fluor 488 (Life Technologies, 1:500).

398 Spleen and lymph node and sections were scanned under 100x magnification using a Nikon

399 Eclipse Ti inverted fluorescent microscope (Nikon, Melville, NY) to capture and stitch multiple

400 fields. Analysis was carried out on ten randomly selected B cell follicles per tissue.

401 Quantification of Ki-67 was carried out in Imaris software by manually selecting follicles followed

402 by counting Ki-67 using the spots tool. Mx1 was quantified in Fiji by selecting B cell follicles and

403 thresholding a mask using the “Moments” parameters followed by counting the number of Mx1

404 positive and Mx1 negative pixels to calculate percent of pixels positive for Mx1.

405 In situ hybridization analysis of SIV RNA in the spleen was carried out as previously

406 described (67). Assays were carried out using RNAscope technology (Advanced Cell

407 Diagnostics). Spleen sections (5 $\mu$ m) on glass slides were baked at 60°C for 1 hour before

408 deparaffinization in xylene (2  $\times$  5 minutes) followed by 100% ethanol (2  $\times$  3 minutes). Slides

409 were then pretreated with hydrogen peroxide reagent to quench endogenous peroxidases.

410 Antigen retrieval was performed by boiling slides for 20 minutes in antigen retrieval buffer

411 followed by washing in deionized water and ethanol and baking for 30 minutes at 60°C.

412 SIVmac239 probes (Advanced Cell Diagnostics) targeting SIV gag, pol, tat, rev, env, vpx, vpr,

413 nef and rev genes were then hybridized to tissue for 2 hours at 40°C. Following the

414 recommended six amplification steps, DAB-A and B reagents were mixed and incubated with

415 tissue until visual detection of brown color was achieved. Tissues were counterstained with CAT



416 Hematoxylin for 30 seconds and briefly rinsed with tap H<sub>2</sub>O. Coverslips were mounted using  
417 Permunt mounting media and allowed to cure overnight before imaging. Scanned images of  
418 whole mounted tissue cross sections were acquired as described above. SIV+ cells were  
419 quantified in FIJI software by color thresholding followed by the particle analysis tool with size  
420 parameters adjusted to detect only cells.

421

#### 422 *Statistical Analysis*

423 All statistical analyses were performed using either Prism v.8 (Graph Pad) or R version 3.5.1.  
424 Data distributions were assessed using D'Agostino and Pearson normality tests. Comparisons  
425 of proportions of immune cell populations and cytokines across and between TypP and RP  
426 infants were made using 2-tailed Mann–Whitney U tests, Wilcoxon matched-pairs signed-ranks  
427 tests, or t-tests when appropriate.

428

429 **Acknowledgements** This work was supported in part by the following National Institutes of  
430 Health awards: R01-DE023047 and R01 AI133706. This work was also supported by the  
431 University of Washington Pathobiology Training Grant T32-A1750915. The Washington National  
432 Primate Center is supported by grant P51 OD010425 from the NIH Office of Research  
433 Infrastructure Programs. The authors would also like to acknowledge the veterinary and support  
434 staff at the Washington National Primate Research Center and LaRene Kuller and Richard  
435 Grant for support with RNA processing for Nanostring analysis, Brian Johnson at the University  
436 of Washington Histology and Imaging Core for expertise and technical assistance and Roger  
437 Wiseman and Eileen Maher at the University of Wisconsin Madison and the Wisconsin National  
438 Primate Research Center for assistance with MHC typing.

439

440 **Author Contributions:**

441 Conceptualization: MPW, DLS, AC, DHF  
442 Data Curation: MPW, CIJ, KAF, BGO  
443 Formal Analysis: MPW, CIJ, KAF, JTF  
444 Funding Acquisition: DLS, DHF  
445 Investigation: MPW, CIJ, KAF, JTF, JH, MM, BSF, PM, PJW  
446 Methodology: BGO, NS, MM, MPW, CIJ, PJW  
447 Project Administration: MPW, AC, DLS, NS  
448 Resources: NS, DHF,  
449 Software: MPW, KAF  
450 Supervision: MPW, DLS, AC  
451 Validation: MPW, MM, BGO  
452 Visualization: MPW, DLS  
453 Writing – Original Draft Preparation: MPW, DLS, CIJ  
454 Writing – Review and Editing: MPW, MM, AC, DLS, DHF

455

## 456 **References**

- 457 1. UNAIDS. AIDSinfo 2019 [cited 2019. Available from: [aidsinfo.unaids.org](https://aidsinfo.unaids.org).
- 458 2. Newell ML, Coovadia H, Cortina-Borja M, Rollins N, Gaillard P, Dabis F, et al. Mortality of  
459 infected and uninfected infants born to HIV-infected mothers in Africa: a pooled analysis.  
460 Lancet. 2004;364(9441):1236-43, [10.1016/S0140-6736\(04\)17140-7](https://doi.org/10.1016/S0140-6736(04)17140-7),  
461 <https://www.ncbi.nlm.nih.gov/pubmed/15464184>.
- 462 3. Espanol T, Garcia-Armui R, Bofill A, Sune J, Bertran JM. Hypogammaglobulinaemia and  
463 negative anti-HIV antibodies in AIDS. Arch Dis Child. 1987;62(8):853-4, [10.1136/adc.62.8.853](https://doi.org/10.1136/adc.62.8.853),  
464 <https://www.ncbi.nlm.nih.gov/pubmed/3662596>.

- 465 4. Pahwa R, Good RA, Pahwa S. Prematurity, hypogammaglobulinemia, and  
466 neuropathology with human immunodeficiency virus (HIV) infection. Proc Natl Acad Sci U S A.  
467 1987;84(11):3826-30, 10.1073/pnas.84.11.3826,  
468 <https://www.ncbi.nlm.nih.gov/pubmed/3473485>.
- 469 5. Gaetano C, Scano G, Carbonari M, Giannini G, Mezzaroma I, Aiuti F, et al. Delayed and  
470 defective anti-HIV IgM response in infants. Lancet. 1987;1(8533):631, 10.1016/s0140-  
471 6736(87)90272-8, <https://www.ncbi.nlm.nih.gov/pubmed/2881166>.
- 472 6. Goulder PJ, Jeena P, Tudor-Williams G, Burchett S. Paediatric HIV infection: correlates of  
473 protective immunity and global perspectives in prevention and management. Br Med Bull.  
474 2001;58:89-108, 10.1093/bmb/58.1.89, <https://www.ncbi.nlm.nih.gov/pubmed/11714626>.
- 475 7. Tovo PA, de Martino M, Gabiano C, Cappello N, D'Elia R, Loy A, et al. Prognostic factors  
476 and survival in children with perinatal HIV-1 infection. The Italian Register for HIV Infections in  
477 Children. Lancet. 1992;339(8804):1249-53, 10.1016/0140-6736(92)91592-v,  
478 <https://www.ncbi.nlm.nih.gov/pubmed/1349667>.
- 479 8. Pahwa S, Kaplan M, Fikrig S, Pahwa R, Sarngadharan MG, Popovic M, et al. Spectrum of  
480 human T-cell lymphotropic virus type III infection in children. Recognition of symptomatic,  
481 asymptomatic, and seronegative patients. JAMA. 1986;255(17):2299-305,  
482 <https://www.ncbi.nlm.nih.gov/pubmed/3007791>.
- 483 9. Stacey AR, Norris PJ, Qin L, Haygreen EA, Taylor E, Heitman J, et al. Induction of a  
484 striking systemic cytokine cascade prior to peak viremia in acute human immunodeficiency  
485 virus type 1 infection, in contrast to more modest and delayed responses in acute hepatitis B

- 486 and C virus infections. *J Virol.* 2009;83(8):3719-33, 10.1128/JVI.01844-08,  
487 <https://www.ncbi.nlm.nih.gov/pubmed/19176632>.
- 488 10. Moir S, Chun TW, Fauci AS. Pathogenic mechanisms of HIV disease. *Annu Rev Pathol.*  
489 2011;6:223-48, 10.1146/annurev-pathol-011110-130254,  
490 <https://www.ncbi.nlm.nih.gov/pubmed/21034222>.
- 491 11. Cohen MS, Shaw GM, McMichael AJ, Haynes BF. Acute HIV-1 Infection. *N Engl J Med.*  
492 2011;364(20):1943-54, 10.1056/NEJMra1011874,  
493 <https://www.ncbi.nlm.nih.gov/pubmed/21591946>.
- 494 12. Tomaras GD, Haynes BF. HIV-1-specific antibody responses during acute and chronic  
495 HIV-1 infection. *Curr Opin HIV AIDS.* 2009;4(5):373-9, 10.1097/COH.0b013e32832f00c0,  
496 <https://www.ncbi.nlm.nih.gov/pubmed/20048700>.
- 497 13. Goulder PJ, Lewin SR, Leitman EM. Paediatric HIV infection: the potential for cure. *Nat*  
498 *Rev Immunol.* 2016;16(4):259-71, 10.1038/nri.2016.19,  
499 <https://www.ncbi.nlm.nih.gov/pubmed/26972723>.
- 500 14. Prendergast AJ, Chasekwa B, Rukobo S, Govha M, Mutasa K, Ntozini R, et al. Intestinal  
501 Damage and Inflammatory Biomarkers in Human Immunodeficiency Virus (HIV)-Exposed and  
502 HIV-Infected Zimbabwean Infants. *J Infect Dis.* 2017;216(6):651-61, 10.1093/infdis/jix367,  
503 <https://www.ncbi.nlm.nih.gov/pubmed/28934432>.
- 504 15. Pananghat AN, Aggarwal H, Prakash SS, Makhdoomi MA, Singh R, Lodha R, et al. IL-8  
505 Alterations in HIV-1 Infected Children With Disease Progression. *Medicine (Baltimore).*  
506 2016;95(21):e3734, 10.1097/MD.0000000000003734,  
507 <https://www.ncbi.nlm.nih.gov/pubmed/27227934>.

- 508 16. Baba TW, Jeong YS, Pennick D, Bronson R, Greene MF, Ruprecht RM. Pathogenicity of  
509 live, attenuated SIV after mucosal infection of neonatal macaques. *Science*.  
510 1995;267(5205):1820-5, 10.1126/science.7892606,  
511 <https://www.ncbi.nlm.nih.gov/pubmed/7892606>.
- 512 17. Marthas ML, van Rompay KK, Otsyula M, Miller CJ, Canfield DR, Pedersen NC, et al. Viral  
513 factors determine progression to AIDS in simian immunodeficiency virus-infected newborn  
514 rhesus macaques. *J Virol*. 1995;69(7):4198-205, 10.1128/JVI.69.7.4198-4205.1995,  
515 <https://www.ncbi.nlm.nih.gov/pubmed/7769679>.
- 516 18. Abel K, Pahar B, Van Rompay KK, Fritts L, Sin C, Schmidt K, et al. Rapid virus  
517 dissemination in infant macaques after oral simian immunodeficiency virus exposure in the  
518 presence of local innate immune responses. *J Virol*. 2006;80(13):6357-67, 10.1128/JVI.02240-  
519 05, <https://www.ncbi.nlm.nih.gov/pubmed/16775324>.
- 520 19. Chakraborty R. HIV-1 infection in children: a clinical and immunologic overview. *Curr HIV*  
521 *Res*. 2005;3(1):31-41, 10.2174/1570162052773022,  
522 <https://www.ncbi.nlm.nih.gov/pubmed/15638721>.
- 523 20. Wang X, Xu H, Pahar B, Alvarez X, Green LC, Dufour J, et al. Simian immunodeficiency  
524 virus selectively infects proliferating CD4+ T cells in neonatal rhesus macaques. *Blood*.  
525 2010;116(20):4168-74, 10.1182/blood-2010-03-273482,  
526 <https://www.ncbi.nlm.nih.gov/pubmed/20716768>.
- 527 21. Milush JM, Kosub D, Marthas M, Schmidt K, Scott F, Wozniakowski A, et al. Rapid  
528 dissemination of SIV following oral inoculation. *AIDS*. 2004;18(18):2371-80,  
529 <https://www.ncbi.nlm.nih.gov/pubmed/15622313>.

- 530 22. Durudas A, Milush JM, Chen HL, Engram JC, Silvestri G, Sodora DL. Elevated levels of  
531 innate immune modulators in lymph nodes and blood are associated with more-rapid disease  
532 progression in simian immunodeficiency virus-infected monkeys. *J Virol.* 2009;83(23):12229-40,  
533 10.1128/JVI.01311-09, <https://www.ncbi.nlm.nih.gov/pubmed/19759147>.
- 534 23. Easlick J, Szubin R, Lantz S, Baumgarth N, Abel K. The early interferon alpha subtype  
535 response in infant macaques infected orally with SIV. *J Acquir Immune Defic Syndr.*  
536 2010;55(1):14-28, 10.1097/QAI.0b013e3181e696ca,  
537 <https://www.ncbi.nlm.nih.gov/pubmed/20616742>.
- 538 24. Letvin NL, King NW. Immunologic and pathologic manifestations of the infection of  
539 rhesus monkeys with simian immunodeficiency virus of macaques. *J Acquir Immune Defic Syndr*  
540 (1988). 1990;3(11):1023-40, <https://www.ncbi.nlm.nih.gov/pubmed/2213505>.
- 541 25. Otsyula MG, Miller CJ, Marthas ML, Van Rompay KK, Collins JR, Pedersen NC, et al. Virus-  
542 induced immunosuppression is linked to rapidly fatal disease in infant rhesus macaques  
543 infected with simian immunodeficiency virus. *Pediatr Res.* 1996;39(4 Pt 1):630-5,  
544 10.1203/00006450-199604000-00012, <https://www.ncbi.nlm.nih.gov/pubmed/8848337>.
- 545 26. Dykhuizen M, Mitchen JL, Montefiori DC, Thomson J, Acker L, Lardy H, et al.  
546 Determinants of disease in the simian immunodeficiency virus-infected rhesus macaque:  
547 characterizing animals with low antibody responses and rapid progression. *J Gen Virol.* 1998;79  
548 ( Pt 10):2461-7, 10.1099/0022-1317-79-10-2461,  
549 <https://www.ncbi.nlm.nih.gov/pubmed/9780052>.
- 550 27. Titanji K, Velu V, Chennareddi L, Vijay-Kumar M, Gewirtz AT, Freeman GJ, et al. Acute  
551 depletion of activated memory B cells involves the PD-1 pathway in rapidly progressing SIV-

- 552 infected macaques. *J Clin Invest.* 2010;120(11):3878-90, [10.1172/JCI43271](https://doi.org/10.1172/JCI43271),
- 553 <https://www.ncbi.nlm.nih.gov/pubmed/20972331>.
- 554 28. Brown CR, Czapiga M, Kabat J, Dang Q, Ourmanov I, Nishimura Y, et al. Unique
- 555 pathology in simian immunodeficiency virus-infected rapid progressor macaques is consistent
- 556 with a pathogenesis distinct from that of classical AIDS. *J Virol.* 2007;81(11):5594-606,
- 557 [10.1128/JVI.00202-07](https://doi.org/10.1128/JVI.00202-07), <https://www.ncbi.nlm.nih.gov/pubmed/17376901>.
- 558 29. Tsai L, Tasovski I, Leda AR, Chin MP, Cheng-Mayer C. The number and genetic
- 559 relatedness of transmitted/founder virus impact clinical outcome in vaginal R5 SHIVSF162P3N
- 560 infection. *Retrovirology.* 2014;11:22, [10.1186/1742-4690-11-22](https://doi.org/10.1186/1742-4690-11-22),
- 561 <https://www.ncbi.nlm.nih.gov/pubmed/24612462>.
- 562 30. Liu Z, Cumberland WG, Hultin LE, Prince HE, Detels R, Giorgi JV. Elevated CD38 antigen
- 563 expression on CD8+ T cells is a stronger marker for the risk of chronic HIV disease progression
- 564 to AIDS and death in the Multicenter AIDS Cohort Study than CD4+ cell count, soluble immune
- 565 activation markers, or combinations of HLA-DR and CD38 expression. *J Acquir Immune Defic*
- 566 *Syndr Hum Retrovirology.* 1997;16(2):83-92, [10.1097/00042560-199710010-00003](https://doi.org/10.1097/00042560-199710010-00003),
- 567 <https://www.ncbi.nlm.nih.gov/pubmed/9358102>.
- 568 31. Brenchley JM, Price DA, Schacker TW, Asher TE, Silvestri G, Rao S, et al. Microbial
- 569 translocation is a cause of systemic immune activation in chronic HIV infection. *Nat Med.*
- 570 *2006;12(12):1365-71*, [10.1038/nm1511](https://doi.org/10.1038/nm1511), <https://www.ncbi.nlm.nih.gov/pubmed/17115046>.
- 571 32. Bosinger SE, Sodora DL, Silvestri G. Generalized immune activation and innate immune
- 572 responses in simian immunodeficiency virus infection. *Curr Opin HIV AIDS.* 2011;6(5):411-8,
- 573 [10.1097/COH.0b013e3283499cf6](https://doi.org/10.1097/COH.0b013e3283499cf6), <https://www.ncbi.nlm.nih.gov/pubmed/21743324>.

- 574 33. Burgener A, McGowan I, Klatt NR. HIV and mucosal barrier interactions: consequences  
575 for transmission and pathogenesis. *Curr Opin Immunol*. 2015;36:22-30,  
576 10.1016/j.coi.2015.06.004, <https://www.ncbi.nlm.nih.gov/pubmed/26151777>.
- 577 34. Malaspina A, Moir S, Kottlilil S, Hallahan CW, Ehler LA, Liu S, et al. Deleterious effect of  
578 HIV-1 plasma viremia on B cell costimulatory function. *J Immunol*. 2003;170(12):5965-72,  
579 10.4049/jimmunol.170.12.5965, <https://www.ncbi.nlm.nih.gov/pubmed/12794123>.
- 580 35. Barnett BE, Staupé RP, Odorizzi PM, Palko O, Tomov VT, Mahan AE, et al. Cutting Edge: B  
581 Cell-Intrinsic T-bet Expression Is Required To Control Chronic Viral Infection. *J Immunol*.  
582 2016;197(4):1017-22, 10.4049/jimmunol.1500368,  
583 <https://www.ncbi.nlm.nih.gov/pubmed/27430722>.
- 584 36. Knox JJ, Buggert M, Kardava L, Seaton KE, Eller MA, Canaday DH, et al. T-bet+ B cells are  
585 induced by human viral infections and dominate the HIV gp140 response. *JCI Insight*. 2017;2(8),  
586 10.1172/jci.insight.92943, <https://www.ncbi.nlm.nih.gov/pubmed/28422752>.
- 587 37. Muehlinghaus G, Cigliano L, Huehn S, Peddinghaus A, Leyendeckers H, Hauser AE, et al.  
588 Regulation of CXCR3 and CXCR4 expression during terminal differentiation of memory B cells  
589 into plasma cells. *Blood*. 2005;105(10):3965-71, 10.1182/blood-2004-08-2992,  
590 <https://www.ncbi.nlm.nih.gov/pubmed/15687242>.
- 591 38. Wang X, Cho B, Suzuki K, Xu Y, Green JA, An J, et al. Follicular dendritic cells help  
592 establish follicle identity and promote B cell retention in germinal centers. *J Exp Med*.  
593 2011;208(12):2497-510, 10.1084/jem.20111449,  
594 <https://www.ncbi.nlm.nih.gov/pubmed/22042977>.



- 595 39. Havenar-Daughton C, Lindqvist M, Heit A, Wu JE, Reiss SM, Kendric K, et al. CXCL13 is a  
596 plasma biomarker of germinal center activity. *Proc Natl Acad Sci U S A*. 2016;113(10):2702-7,  
597 10.1073/pnas.1520112113, <https://www.ncbi.nlm.nih.gov/pubmed/26908875>.
- 598 40. Bosinger SE, Li Q, Gordon SN, Klatt NR, Duan L, Xu L, et al. Global genomic analysis  
599 reveals rapid control of a robust innate response in SIV-infected sooty mangabeys. *J Clin Invest*.  
600 2009;119(12):3556-72, 10.1172/JCI40115, <https://www.ncbi.nlm.nih.gov/pubmed/19959874>.
- 601 41. Jacquelin B, Mayau V, Targat B, Liovat AS, Kunkel D, Petitjean G, et al. Nonpathogenic  
602 SIV infection of African green monkeys induces a strong but rapidly controlled type I IFN  
603 response. *J Clin Invest*. 2009;119(12):3544-55, 10.1172/JCI40093,  
604 <https://www.ncbi.nlm.nih.gov/pubmed/19959873>.
- 605 42. Harris LD, Tabb B, Sodora DL, Paiardini M, Klatt NR, Douek DC, et al. Downregulation of  
606 robust acute type I interferon responses distinguishes nonpathogenic simian immunodeficiency  
607 virus (SIV) infection of natural hosts from pathogenic SIV infection of rhesus macaques. *J Virol*.  
608 2010;84(15):7886-91, 10.1128/JVI.02612-09,  
609 <https://www.ncbi.nlm.nih.gov/pubmed/20484518>.
- 610 43. Hardy GA, Sieg S, Rodriguez B, Anthony D, Asaad R, Jiang W, et al. Interferon-alpha is the  
611 primary plasma type-I IFN in HIV-1 infection and correlates with immune activation and disease  
612 markers. *PLoS One*. 2013;8(2):e56527, 10.1371/journal.pone.0056527,  
613 <https://www.ncbi.nlm.nih.gov/pubmed/23437155>.
- 614 44. Ito T, Yang M, Wang YH, Lande R, Gregorio J, Perng OA, et al. Plasmacytoid dendritic  
615 cells prime IL-10-producing T regulatory cells by inducible costimulator ligand. *J Exp Med*.

- 616 2007;204(1):105-15, 10.1084/jem.20061660,  
617 <https://www.ncbi.nlm.nih.gov/pubmed/17200410>.
- 618 45. Banchereau J, Briere F, Caux C, Davoust J, Lebecque S, Liu YJ, et al. Immunobiology of  
619 dendritic cells. *Annu Rev Immunol*. 2000;18:767-811, 10.1146/annurev.immunol.18.1.767,  
620 <https://www.ncbi.nlm.nih.gov/pubmed/10837075>.
- 621 46. Xu H, Wang X, Malam N, Lackner AA, Veazey RS. Persistent Simian Immunodeficiency  
622 Virus Infection Causes Ultimate Depletion of Follicular Th Cells in AIDS. *J Immunol*.  
623 2015;195(9):4351-7, 10.4049/jimmunol.1501273,  
624 <https://www.ncbi.nlm.nih.gov/pubmed/26408660>.
- 625 47. Hirsch VM, Martin JE, Dapolito G, Elkins WR, London WT, Goldstein S, et al. Spontaneous  
626 substitutions in the vicinity of the V3 analog affect cell tropism and pathogenicity of simian  
627 immunodeficiency virus. *J Virol*. 1994;68(4):2649-61, 10.1128/JVI.68.4.2649-2661.1994,  
628 <https://www.ncbi.nlm.nih.gov/pubmed/8139042>.
- 629 48. Brocca-Cofano E, Kuhrt D, Siewe B, Xu C, Haret-Richter GS, Craig J, et al. Pathogenic  
630 Correlates of Simian Immunodeficiency Virus-Associated B Cell Dysfunction. *J Virol*.  
631 2017;91(23), 10.1128/JVI.01051-17, <https://www.ncbi.nlm.nih.gov/pubmed/28931679>.
- 632 49. Moir S, Malaspina A, Pickeral OK, Donoghue ET, Vasquez J, Miller NJ, et al. Decreased  
633 survival of B cells of HIV-viremic patients mediated by altered expression of receptors of the  
634 TNF superfamily. *J Exp Med*. 2004;200(7):587-99,  
635 <https://www.ncbi.nlm.nih.gov/pubmed/15508184>.

- 636 50. Peters M, Ambrus JL, Zheleznyak A, Walling D, Hoofnagle JH. Effect of interferon-alpha  
637 on immunoglobulin synthesis by human B cells. *J Immunol.* 1986;137(10):3153-7,  
638 <https://www.ncbi.nlm.nih.gov/pubmed/3021846>.
- 639 51. Oka H, Hirohata S, Inoue T, Ito K. Effects of interferon-alpha on human B cell  
640 responsiveness: biphasic effects in cultures stimulated with *Staphylococcus aureus*. *Cell*  
641 *Immunol.* 1992;139(2):478-92, 10.1016/0008-8749(92)90087-6,  
642 <https://www.ncbi.nlm.nih.gov/pubmed/1346369>.
- 643 52. Cubas RA, Mudd JC, Savoye AL, Perreau M, van Grevenynghe J, Metcalf T, et al.  
644 Inadequate T follicular cell help impairs B cell immunity during HIV infection. *Nat Med.*  
645 2013;19(4):494-9, 10.1038/nm.3109, <https://www.ncbi.nlm.nih.gov/pubmed/23475201>.
- 646 53. Petrovas C, Yamamoto T, Gerner MY, Boswell KL, Wloka K, Smith EC, et al. CD4 T  
647 follicular helper cell dynamics during SIV infection. *J Clin Invest.* 2012;122(9):3281-94,  
648 10.1172/JCI63039, <https://www.ncbi.nlm.nih.gov/pubmed/22922258>.
- 649 54. Moukambi F, Rabazanahary H, Rodrigues V, Racine G, Robitaille L, Krust B, et al. Early  
650 Loss of Splenic Tfh Cells in SIV-Infected Rhesus Macaques. *PLoS Pathog.* 2015;11(12):e1005287,  
651 10.1371/journal.ppat.1005287, <https://www.ncbi.nlm.nih.gov/pubmed/26640894>.
- 652 55. Rabazanahary H, Moukambi F, Palesch D, Clain J, Racine G, Andreani G, et al. Despite  
653 early antiretroviral therapy effector memory and follicular helper CD4 T cells are major  
654 reservoirs in visceral lymphoid tissues of SIV-infected macaques. *Mucosal Immunol.*  
655 2020;13(1):149-60, 10.1038/s41385-019-0221-x,  
656 <https://www.ncbi.nlm.nih.gov/pubmed/31723251>.

- 657 56. Fukazawa Y, Lum R, Okoye AA, Park H, Matsuda K, Bae JY, et al. B cell follicle sanctuary  
658 permits persistent productive simian immunodeficiency virus infection in elite controllers. Nat  
659 Med. 2015;21(2):132-9, 10.1038/nm.3781, <https://www.ncbi.nlm.nih.gov/pubmed/25599132>.
- 660 57. Mavigner M, Habib J, Deleage C, Rosen E, Mattingly C, Bricker K, et al. Simian  
661 Immunodeficiency Virus Persistence in Cellular and Anatomic Reservoirs in Antiretroviral  
662 Therapy-Suppressed Infant Rhesus Macaques. J Virol. 2018;92(18), 10.1128/JVI.00562-18,  
663 <https://www.ncbi.nlm.nih.gov/pubmed/29997216>.
- 664 58. Obregon-Perko V, Bricker K, Mensah G, Uddin F, Kumar M, Fray E, et al. SHIV.C.CH505  
665 Persistence in ART-Suppressed Infant Macaques is Characterized by Elevated SHIV RNA in the  
666 Gut and High Abundance of Intact SHIV DNA in Naive CD4+ T cells. J Virol. 2020,  
667 10.1128/JVI.01669-20, <https://www.ncbi.nlm.nih.gov/pubmed/33087463>.
- 668 59. van Grevenynghe J, Cubas RA, Noto A, DaFonseca S, He Z, Peretz Y, et al. Loss of  
669 memory B cells during chronic HIV infection is driven by Foxo3a- and TRAIL-mediated apoptosis.  
670 J Clin Invest. 2011;121(10):3877-88, 10.1172/JCI59211,  
671 <https://www.ncbi.nlm.nih.gov/pubmed/21926463>.
- 672 60. Katsikis PD, Wunderlich ES, Smith CA, Herzenberg LA, Herzenberg LA. Fas antigen  
673 stimulation induces marked apoptosis of T lymphocytes in human immunodeficiency virus-  
674 infected individuals. J Exp Med. 1995;181(6):2029-36, 10.1084/jem.181.6.2029,  
675 <https://www.ncbi.nlm.nih.gov/pubmed/7539037>.
- 676 61. Laforge M, Campillo-Gimenez L, Monceaux V, Cumont MC, Hurtrel B, Corbeil J, et al.  
677 HIV/SIV infection primes monocytes and dendritic cells for apoptosis. PLoS Pathog.

- 678 2011;7(6):e1002087, 10.1371/journal.ppat.1002087,  
679 <https://www.ncbi.nlm.nih.gov/pubmed/21731488>.
- 680 62. Fraietta JA, Mueller YM, Yang G, Boesteanu AC, Gracias DT, Do DH, et al. Type I  
681 interferon upregulates Bak and contributes to T cell loss during human immunodeficiency virus  
682 (HIV) infection. PLoS Pathog. 2013;9(10):e1003658, 10.1371/journal.ppat.1003658,  
683 <https://www.ncbi.nlm.nih.gov/pubmed/24130482>.
- 684 63. Innes S, Lazarus E, Otwombe K, Liberty A, Germanus R, Van Rensburg AJ, et al. Early  
685 severe HIV disease precedes early antiretroviral therapy in infants: Are we too late? J Int AIDS  
686 Soc. 2014;17:18914, 10.7448/IAS.17.1.18914,  
687 <https://www.ncbi.nlm.nih.gov/pubmed/24925044>.
- 688 64. Wood MP, Wood LF, Templeton M, Fisher B, Lippy A, Jones CI, et al. Transient Immune  
689 Activation in BCG-Vaccinated Infant Rhesus Macaques Is Not Sufficient to Influence Oral Simian  
690 Immunodeficiency Virus Infection. J Infect Dis. 2020;222(1):44-53, 10.1093/infdis/jiz382,  
691 <https://www.ncbi.nlm.nih.gov/pubmed/31605528>.
- 692 65. Vigdorovich V, Oliver BG, Carbonetti S, Dambrauskas N, Lange MD, Yacoob C, et al.  
693 Repertoire comparison of the B-cell receptor-encoding loci in humans and rhesus macaques by  
694 next-generation sequencing. Clin Transl Immunology. 2016;5(7):e93, 10.1038/cti.2016.42,  
695 <https://www.ncbi.nlm.nih.gov/pubmed/27525066>.
- 696 66. Deng W, Maust BS, Nickle DC, Learn GH, Liu Y, Heath L, et al. DIVEIN: a web server to  
697 analyze phylogenies, sequence divergence, diversity, and informative sites. Biotechniques.  
698 2010;48(5):405-8, 10.2144/000113370, <https://www.ncbi.nlm.nih.gov/pubmed/20569214>.

699 67. Fisher BS, Green RR, Brown RR, Wood MP, Hensley-McBain T, Fisher C, et al. Liver  
700 macrophage-associated inflammation correlates with SIV burden and is substantially reduced  
701 following cART. PLoS Pathog. 2018;14(2):e1006871, 10.1371/journal.ppat.1006871,  
702 <https://www.ncbi.nlm.nih.gov/pubmed/29466439>.

703

704 **Figure 1: SIV-infected infant macaques exhibit disparate anti-SIV IgG responses.** Infants  
705 were infected with SIVmac251 either orally (n=22) or intravenously (n=3) with SIVmac251 and  
706 viral load and production of anti gp120 antibodies was monitored until necropsy at 10–22 weeks  
707 post infection. 15 of 25 infants that did not produce anti-gp140 specific plasma IgG or IgA during  
708 chronic SIV infection (10-12 weeks post-SIV infection) and were characterized as Rapid  
709 Progressors (**RP**)(**A,B**). RP infants failed to reduce plasma viral load after acute infection and  
710 maintained higher viral loads during chronic infection (**D,E**). Typical progressors (**TypP**) are  
711 represented as **closed circles** and RP infants are represented as **open squares**. Statistical  
712 tests used to compare infant groups were carried out as described in the methods \*\* = p<0.01,  
713 \*\*\* = p<0.001, \*\*\*\* = p<0.0001. Error bars are shown as either mean with standard deviation or  
714 median with interquartile range based on data distribution.

715

716 **Figure 2: Number of unique plasma viral variants detected at week 2 post infection**  
717 **negatively correlates with anti-SIV antibodies at wk10.** SIV viral variants were assessed at 2  
718 weeks post-infection from plasma viral RNA on an Illumina MiSeq platform. Representative  
719 phylogenies are shown for TypP (**A**) and RP (**B**) infants. The total number of unique plasma  
720 viral variants was quantified and compared between TypP (**closed circles**) and RP (**open**  
721 **squares**) infants (**C**). Number of viral variants were compared against plasma anti-SIVenv IgG  
722 concentration (**D**). Phylogenies were constructed using maximum likelihood with a GTR  
723 substitution model. Black lines in trees represent challenge stock consensus sequence.

724 Statistical tests used to compare infant groups were carried out as described in the methods \* =  
725  $p < 0.05$ . Error bars are shown as either mean with standard deviation or median with  
726 interquartile range based on data distribution.

727  
728 **Figure 3: Total CD4 T cell levels are sustained during chronic infection in RP infants.** CD4  
729 T cell depletion was monitored over time using a CD4/CD8 ratio in PBMC from TypP (**closed**  
730 **circles**) and RP (**open squares**) infants (**A,B**). The total number of peripheral CD4 T cells was  
731 monitored following SIV infection (**C**). Statistical tests used to compare infant groups were  
732 carried out as described in the methods \* =  $p < 0.05$ , \*\* =  $p < 0.01$ , \*\*\* =  $p < 0.001$ . Error bars are  
733 shown as either mean with standard deviation or median with interquartile range based on data  
734 distribution.

735  
736 **Figure 4: Activation of CD4 and CD8 T cells is increased in typically progressing infants.**  
737 Levels of HLA-DR+ CD4 (**A**) and CD8 (**B**) T cells in peripheral blood were evaluated in TypP  
738 (closed circles) and RP (open squares) infants. Both paired and unpaired and parametric and  
739 nonparametric tests were used to compare groups depending on the distribution of the data. \*\*  
740 =  $p < 0.01$ , \*\*\* =  $p < 0.001$ , \*\*\*\* =  $p < 0.0001$ . Error bars are shown as either mean with standard  
741 deviation or median with interquartile range based on data distribution.

742  
743 **Figure 5: Rapidly progressing infants fail to increase activated memory B cells during**  
744 **chronic infection.** Proportions of CD20+ B cells (**A**) as well as CD80+ activated B cells (**B**) are  
745 shown from PBMC of TypP (closed circles) and RP (open squares) infants. Proportions of  
746 activated memory (**C**) and naïve (**D**) B cell populations from total CD20+ B cells are also  
747 compared between TypP and RP infants. Within activated memory B cells we compared  
748 atypical CD11c, CXCR3 double positive cells in both TypP and RP infants (**E**) and correlations  
749 with anti-SIV antibody levels are shown at week 10-12 (**F**). Statistical tests used to compare  
750 infant groups were carried out as described in the methods \*\* =  $p < 0.01$ , \*\*\* =  $p < 0.001$ , \*\*\*\* =

751 p<0.0001. Error bars are shown as either mean with standard deviation or median with  
752 interquartile range based on data distribution.

753

754 **Figure 6: Rapidly progressing infants exhibit germinal center dysfunction in secondary**

755 **lymphoid tissues.** Plasma CXCL13 concentrations were measured at timepoints prior to and

756 following SIV infection in TypP (**closed circles**) and RP (**open squares**) infants (**A**) Levels of T

757 follicular helper cells(CXCR5+, PD-1+)(**B**) and germinal center B cells (Ki-67+, Bcl6+)(**C**) were

758 measured in axillary lymph node biopsies from early chronic (4-6 weeks post-infection) and

759 necropsy. Paraffin embedded spleens from RP and TypP infants were sectioned and immuno-

760 stained for B cells (CD20, red) proliferation (Ki-67, green) to identify splenic B cell follicles and

761 germinal centers. Representative images are shown for TypP infants (**D**) and RP infants (**E**).

762 Whole sections were scanned and stitched, and Ki-67 positive foci were quantified in B cell

763 follicles of spleen (**F**) and axillary lymph node (**G**). Statistical tests used to compare infant

764 groups were carried out as described in the methods \*\* = p<0.01. Error bars are shown as

765 either mean with standard deviation or median with interquartile range based on data

766 distribution.

767

768

769 **Figure 7: Elevated Interferon- $\alpha$  and pDC activation in RP infants.** Plasma IFN $\alpha$

770 concentrations were measured by ELISA at multiple time points in TypP and RP infants (**A**).

771 Proportions of activated CD80+ plasmacytoid dendritic (CD163+) in PBMC from TypP (**closed**

772 **circles**) and RP (**open squares**) infants were evaluated in blood (**B**) and lymph nodes (**C**) by

773 flow cytometry. Statistical tests used to compare infant groups were carried out as described in

774 the methods \* = p<0.05, \*\*\* = p<0.001, \*\*\*\* = p<0.0001. Error bars are shown as either mean

775 with standard deviation or median with interquartile range based on data distribution.

776



777 **Figure 8: Increased type 1 IFN associated protein expression is observed in B cell**  
778 **follicles of RP infants.** Levels of MX1 protein were measured in areas within B cell follicles of  
779 spleen. Paraffin embedded spleens from RP and TypP infants were sectioned and immuno-  
780 stained for B cells (CD20, red) and MX1 (green) to identify splenic B cell follicles and IFN-  
781 induced protein expression. Representative images are shown for TypP infants (**A-C**) and RP  
782 infants (**D-F**). Whole sections were scanned and stitched and MX1 was quantified within 10  
783 randomly selected splenic B cell follicles (**G**) for TypP (**closed circles**) and RP (**open squares**)  
784 infants. Statistical tests used to compare infant groups were carried out as described in the  
785 methods \* =  $p < 0.05$

786

787 **Figure 9: Rapidly progressing infants have more SIV infected cells localized outside of**  
788 **splenic germinal centers.** RNAscope in situ hybridization using SIV-specific RNA probes was  
789 used to detect SIV-infected cells and cell-free virus in the spleens of TypP (**A**) and RP (**B**)  
790 infants. SIV+ cells were quantified across stitched images and normalized for area of splenic  
791 tissue (**C**). Statistical tests used to compare infant groups were carried out as described in the  
792 methods \* =  $p < 0.05$ . Error bars are shown as floating bars (min to max) with line indicating the  
793 mean. n = 3 per group.

794

795 **Figure 10: Model summarizing factors influencing rapid SIV progression in infants**  
796 Illustration of events following infection in infant macaques exhibiting rapid disease progression.  
797 GC = germinal center; Tfh = T follicular helper cell; pDC = plasmacytoid dendritic cell.

798

799 **Table S1: Study Animals**

800

801 **Figure S1: Viral variants from RP infants are represented across more diverse challenge**  
802 **stock lineages.** Phylogeny of macaque-derived plasma V1V2 variants isolated at 2 weeks post-  
803 infection(colored) and variants within challenge stock (black) (**A**). The number of clades in which  
804 each macaque-derived variant was represented was enumerated and the numbers of  
805 representative clades were compared between variants from TypP and RP macaques (**B**).  
806 Phylogenies were constructed using maximum likelihood with a GTR substitution model using  
807 the challenge stock consensus sequence. Statistical tests used to compare infant groups were  
808 carried out as described in the methods \* =  $p < 0.05$ . Error bars are shown as either mean with  
809 standard deviation or median with interquartile range based on data distribution.

810

811 **Figure S2: Similar innate responses to microbial products are observed in typical and**  
812 **rapidly progressing infant macaques.** Plasma sCD14(**A**) and LBP(**B**) concentrations were  
813 measured by ELISA at timepoints prior to and following SIV infection in TypP and RP infants.  
814 Statistical tests used to compare infant groups were carried out as described in the methods \* =  
815  $p < 0.05$

816

817

818

819 **Figure S3: No differences are observed in levels of Resting Memory B cells, Tissue-Like**  
820 **Memory B cells, or IL-21R+ Activated Memory B cells in RP and TypP infants.** Proportions  
821 of memory B cell subsets in TypP infants (**closed circles**) and RP infants (**open squares**).  
822 Percentages of resting memory B cells (RestMem, CD21+, CD27+) and Tissue-Like memory B  
823 cells (TLMem, CD21-, CD27-) were evaluated within the total B cell (CD20+) population in  
824 PMBC (**A+B**). The percentage of Activated Memory B cells (ActMem, CD21-, CD27+) was  
825 measured expressing the IL21 receptor (IL-21R) (**C**). Statistical tests used to compare infant

826 groups were carried out as described in the methods. Error bars are shown as either mean with  
827 standard deviation or median with interquartile range based on data distribution.

828

829

830 **Footnotes**

831 The authors have no conflicts of interest to report.

832

833 This work was supported in part by the following National Institutes of Health awards: NIDCR  
834 grant R01-DE023047. This work was also supported by the University of Washington  
835 Pathobiology Training Grant T32-A1750915. The Washington National Primate Center is  
836 supported by grant P51 OD010425 from the NIH Office of Research Infrastructure  
837 Programs.

838 Corresponding author:

839 Donald Sodora

840 Seattle Children's Research Institute, Center for Global Infectious Diseases

841 Seattle, WA 98109

842 [donald.sodora@seattlechildrens.org](mailto:donald.sodora@seattlechildrens.org)

843 Office: (206)884-3221

844

**A**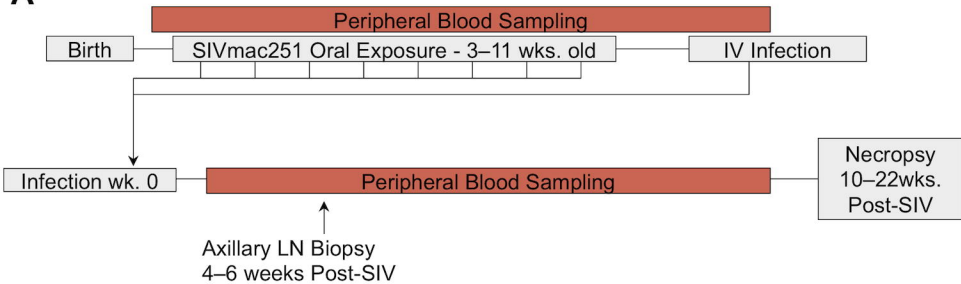**B**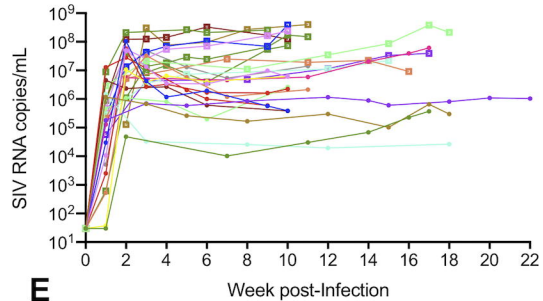**C**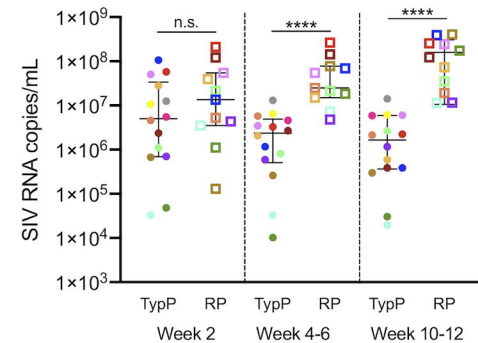**D**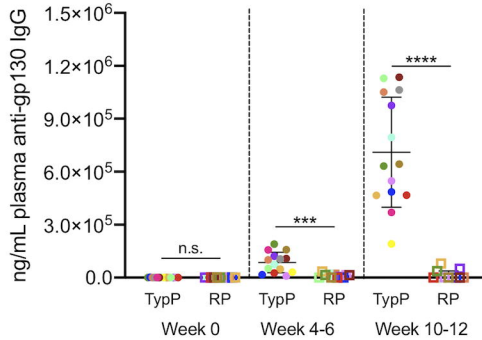**E**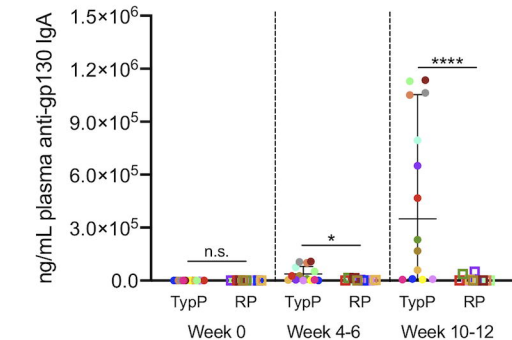

| Infant ID | Sex | MHC Class I Alleles                  | BCG Vaccinated       | Disease Phenotype | Age SIV+ (wks) | Dose SIV+ (TCID50) | Viral Load at Necropsy |
|-----------|-----|--------------------------------------|----------------------|-------------------|----------------|--------------------|------------------------|
| A14112-GD | M   | A1*006, A1*006, B*012, B*048         | Yes - Chronic SIV    | TypP              | 14             | 10000              | 3.70E+05               |
| A14113-GE | F   | A1*001, A1*004, B*001, B*024         | Yes - Chronic SIV    | RP                | 14             | 10000              | 6.17E+07               |
| A14114-GF | M   | A1*004, A1*008, B*001, B*023         | Yes - Chronic SIV    | RP                | 18             | 4000               | 2.15E+08               |
| A14115-GG | M   | A1*008, A1*012, B*012, B*055         | Yes - Chronic SIV    | RP                | 14             | 10000              | 9.18E+06               |
| A14203-HF | M   | A1*002, A1*011, B*012, B*001         | Yes - Chronic SIV    | RP                | 8              | 4000               | 2.20E+07               |
| A14206-HI | F   | A1*004, A1*023, B*012, B*028         | Yes - Chronic SIV    | TypP              | 8              | 4000               | 3.01E+05               |
| A15067-LA | F   | –                                    | Yes - 8 wks of age   | RP                | 17             | 4000               | 1.04E+06               |
| A15068-LB | F   | –                                    | Yes - 8 wks of age   | TypP              | 17             | 4000               | 3.94E+07               |
| A15187-MD | M   | –                                    | Yes - Chronic SIV    | TypP              | 11             | 4000               | 2.65E+04               |
| A16079-ZZ | F   | A1*004, A1*023, B*001, B*012         | No                   | RP                | 12             | 20000              | 2.43E+08               |
| A16080-AA | F   | A1*002, B*015                        | No                   | TypP              | 10             | 12000              | 6.03E+06               |
| A16081-AB | F   | A1*002, A1*006, B*012, B*024         | No                   | RP                | 15             | IV                 | 3.91E+08               |
| A16083-AD | M   | A1*026, A1*002, B*001, B*055         | No                   | TypP              | 11             | 15000              | 3.88E+05               |
| A17151-FT | F   | A1*001, A1*008, B*024, B*045         | No                   | TypP              | 11             | 12000              | 2.14E+06               |
| A17152-FU | F   | A1*004, A1*011, B*001, B*066         | No                   | RP                | 13             | 20000              | 4.04E+08               |
| A17153-FV | F   | A1*023, A1*025, <b>B*008</b> , B*028 | No                   | TypP              | 6              | 1000               | 3.85E+05               |
| A17154-FW | F   | A1*002, A1*004, B*001                | No                   | TypP              | 10             | 12000              | 1.41E+07               |
| A16185-AT | F   | A1*008, A1*032, B*012, B*068         | Yes - 1-2 wks of age | TypP              | 10             | 12000              | 6.18E+06               |
| A16187-AV | M   | A1*002, A1*001, B*015, B*002         | Yes - 1-2 wks of age | RP                | 8              | 4000               | 7.29E+07               |
| A16188-AW | M   | A1*004, B*012                        | Yes - 1-2 wks of age | RP                | 15             | IV                 | 2.55E+08               |
| A16189-AX | M   | A1*012, A1*025, <b>B*008</b>         | Yes - 1-2 wks of age | TypP              | 15             | IV                 | 5.95E+05               |
| A17097-FA | F   | A1*008, A1*011, B*001, <b>B*008</b>  | Yes - 1-2 wks of age | TypP              | 10             | 12000              | 2.23E+06               |
| A17098-FB | M   | A1*008, A1*023, B*012, B*015         | Yes - 1-2 wks of age | RP                | 13             | 20000              | 1.51E+08               |
| A17099-FC | F   | A1*011, A1*023, B*012, B*024         | Yes - 1-2 wks of age | RP                | 10             | 12000              | 1.22E+08               |
| A17100-FD | M   | A1*001, A1*023, B*002, B*028         | Yes - 1-2 wks of age | TypP              | 13             | 20000              | 2.63E+06               |

**Table S1: Study Animals**

**A**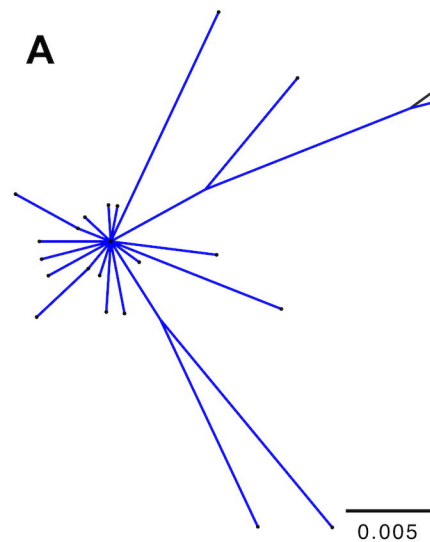**B**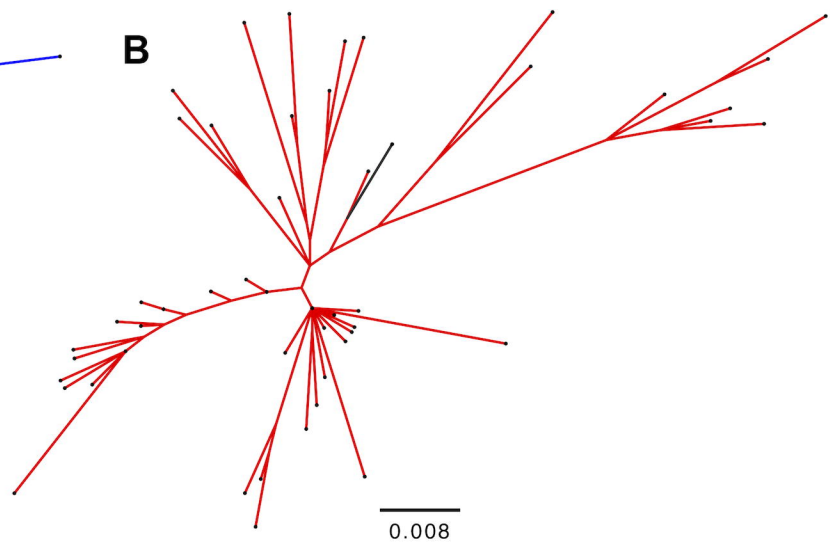**C**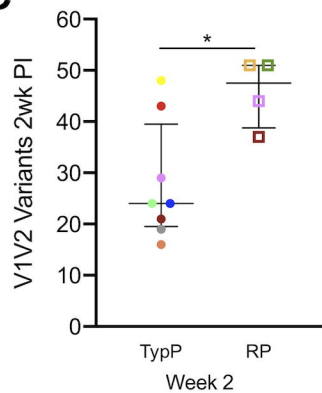**D**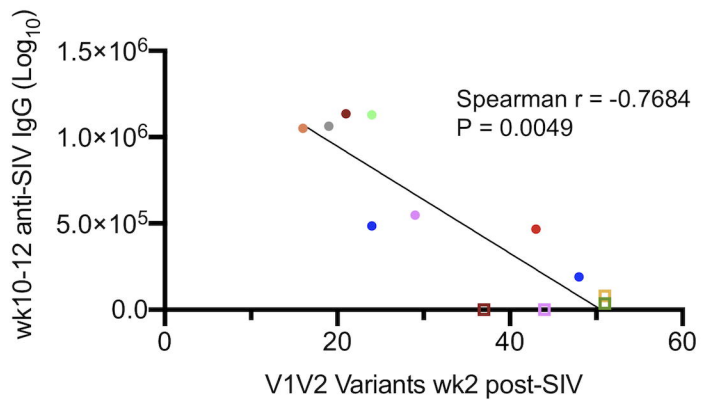

**A**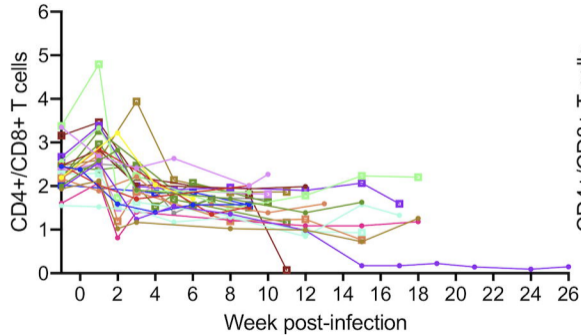**B**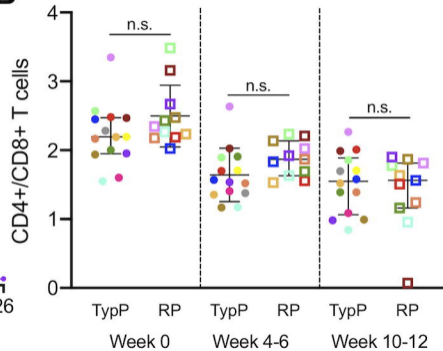**C**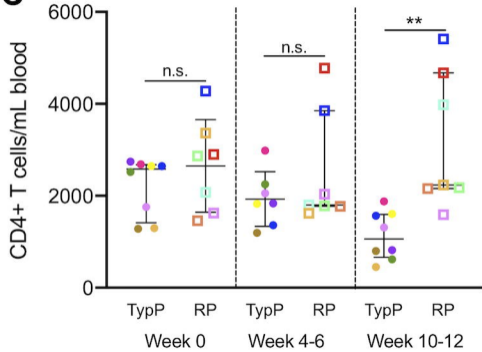

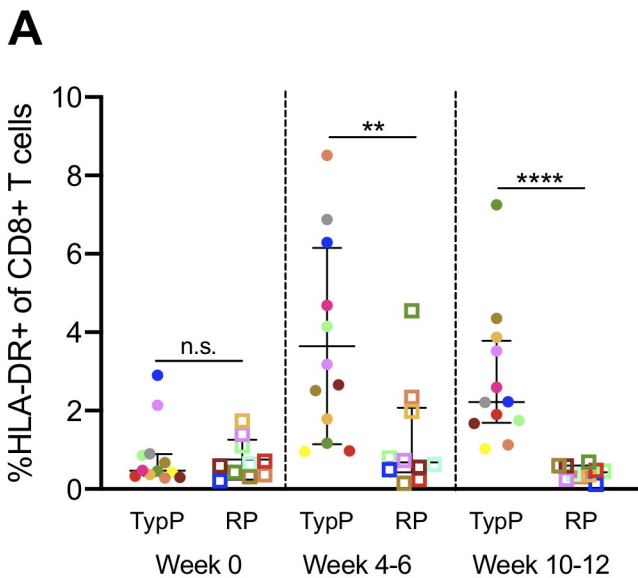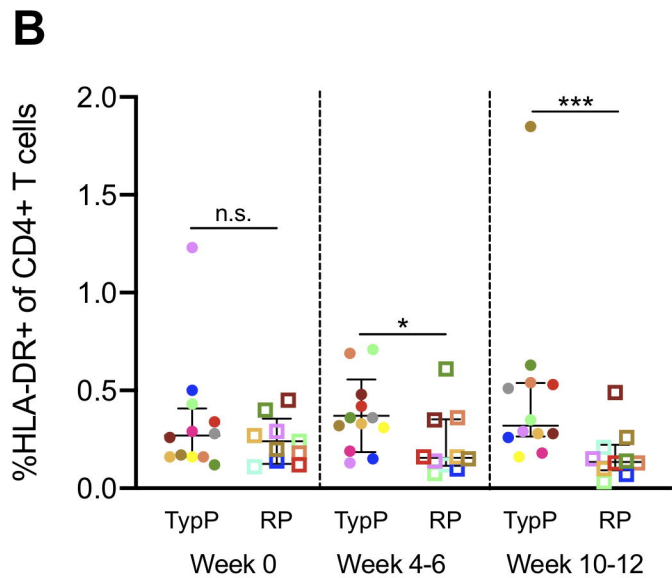



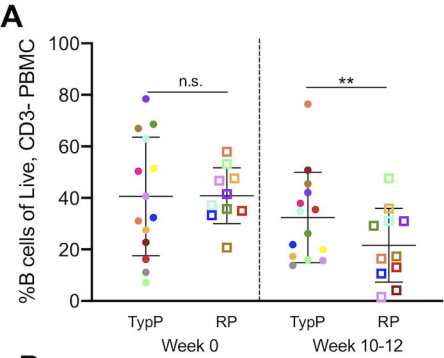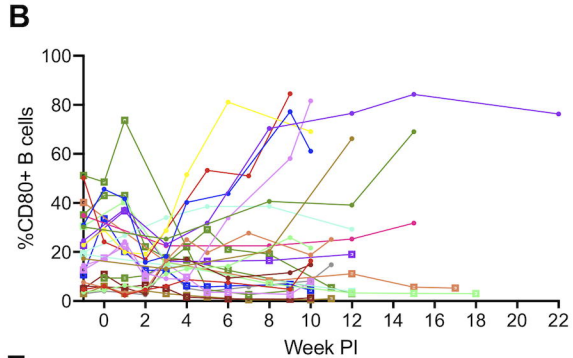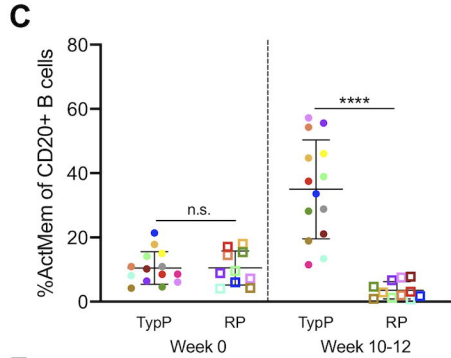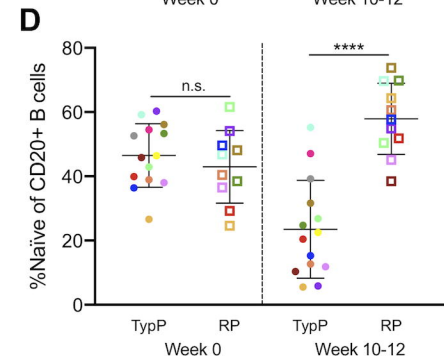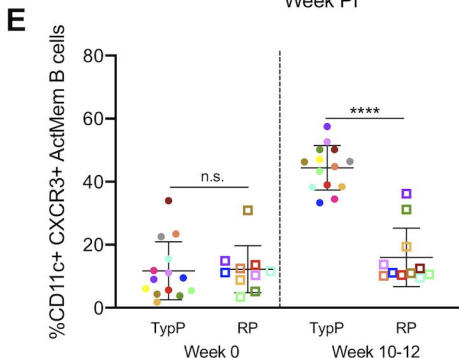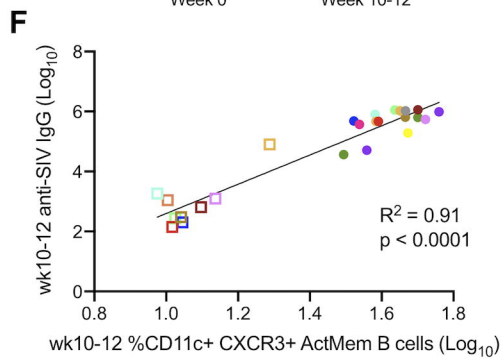

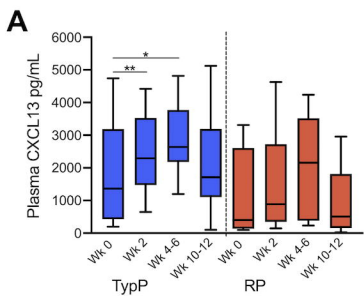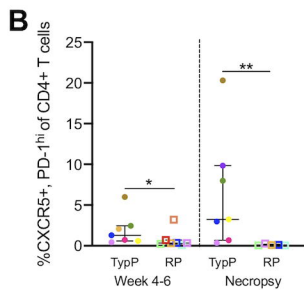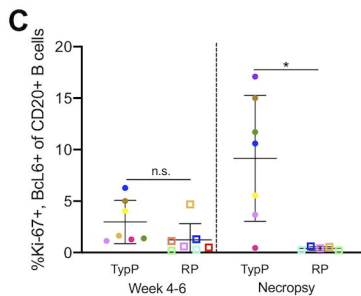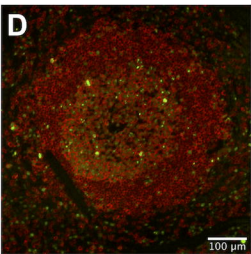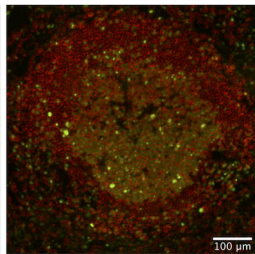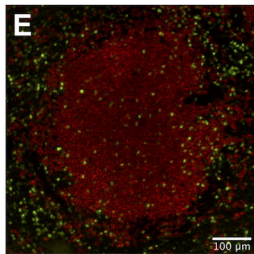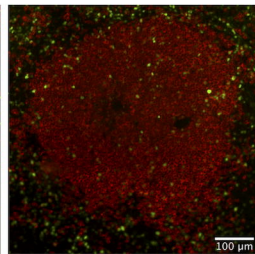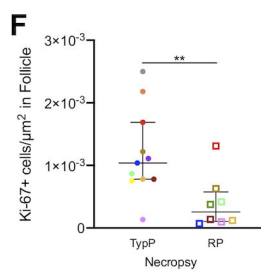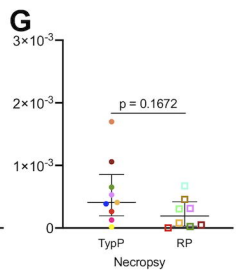

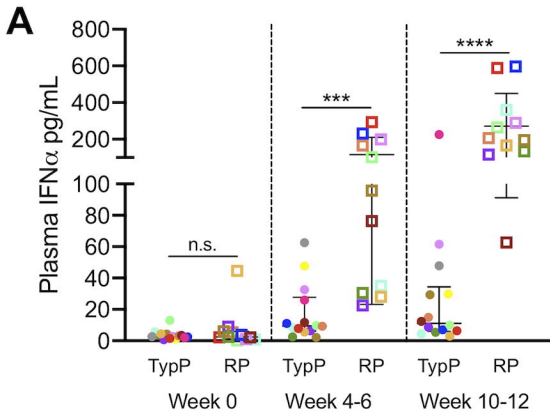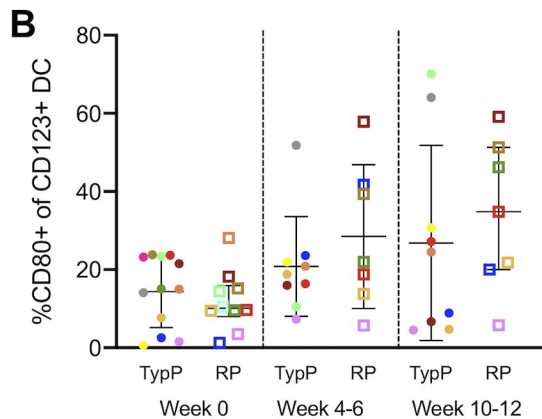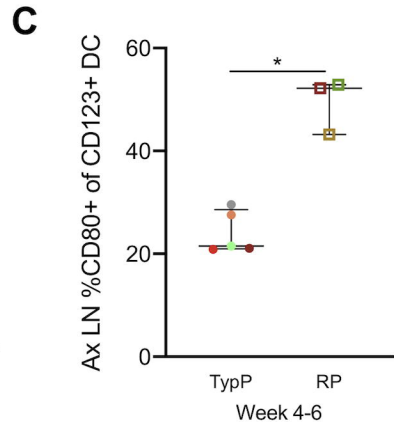

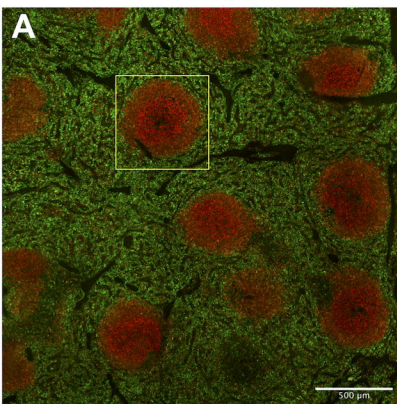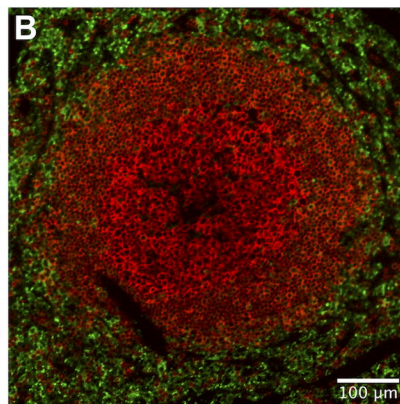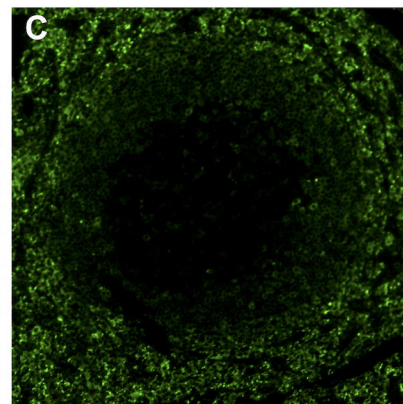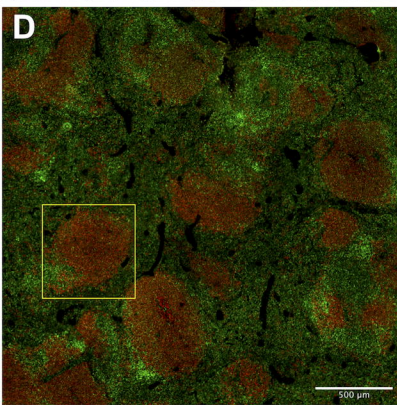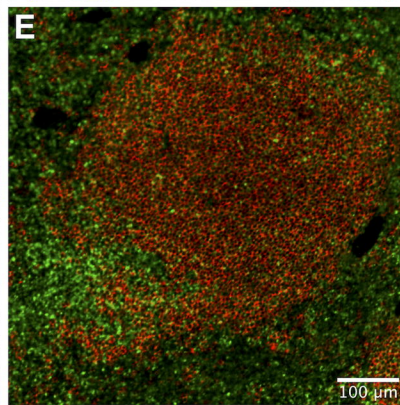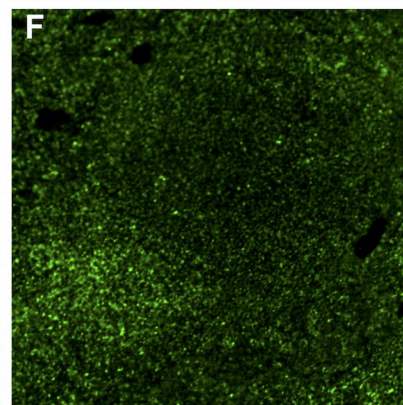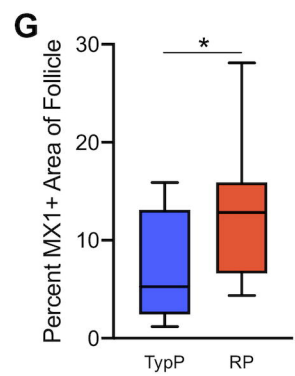

**A**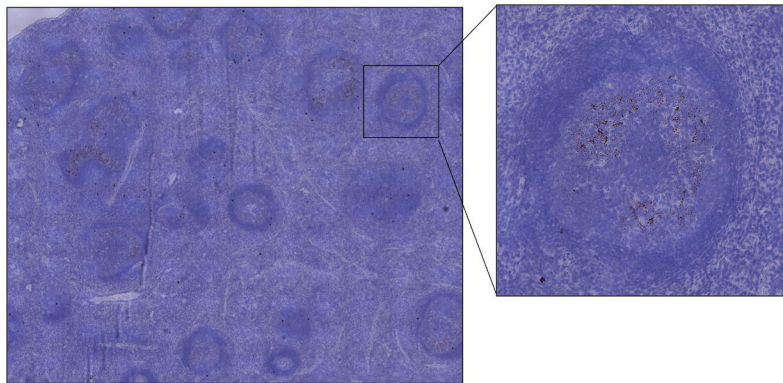**B**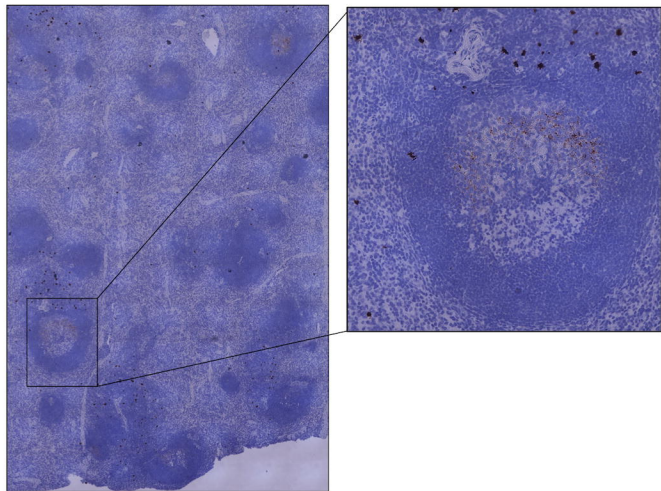**C**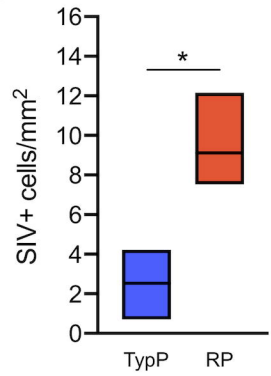

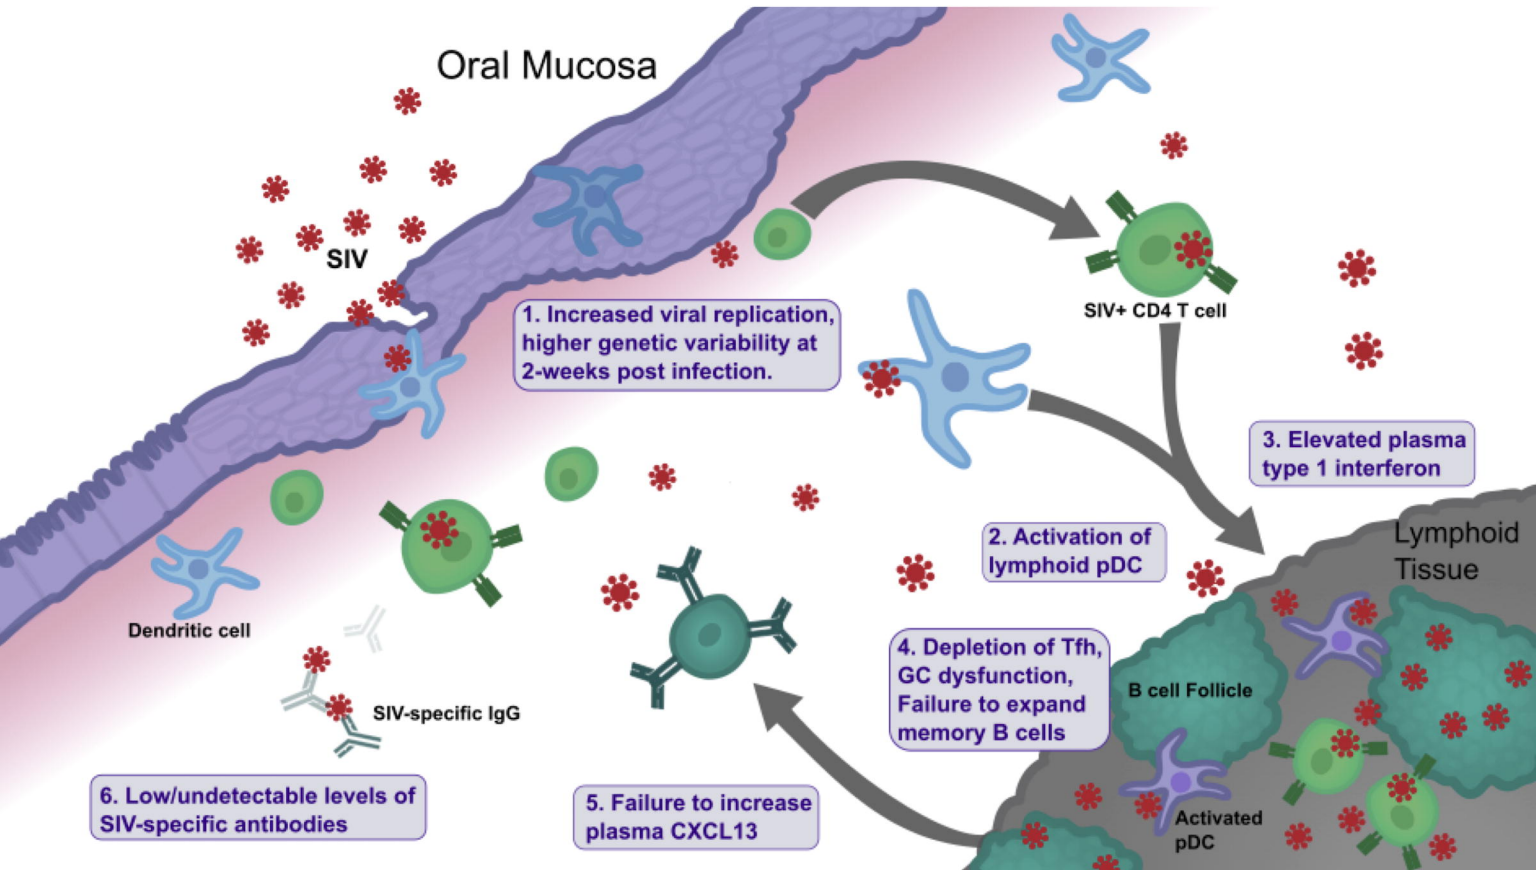

Source: https://biorxiv.org/content/10.1101/2020.12.31.424784v1.full.pdf
